# Supplementary material for: A comprehensive single cell transcriptional landscape of human hematopoietic progenitors
Source: PubMed Central journal article supplement (PMC6546699; doi:10.1038/s41467-019-10291-0), 2019-06-03
Supplement: 41467_2019_10291_MOESM1_ESM.pdf [file 41467_2019_10291_MOESM1_ESM.pdf]

**Supplementary Information for manuscript:  
“A comprehensive landscape of the single-cell transcriptome of  
human hematopoietic progenitors”.**

Pellin et al.

## Supplementary Figures

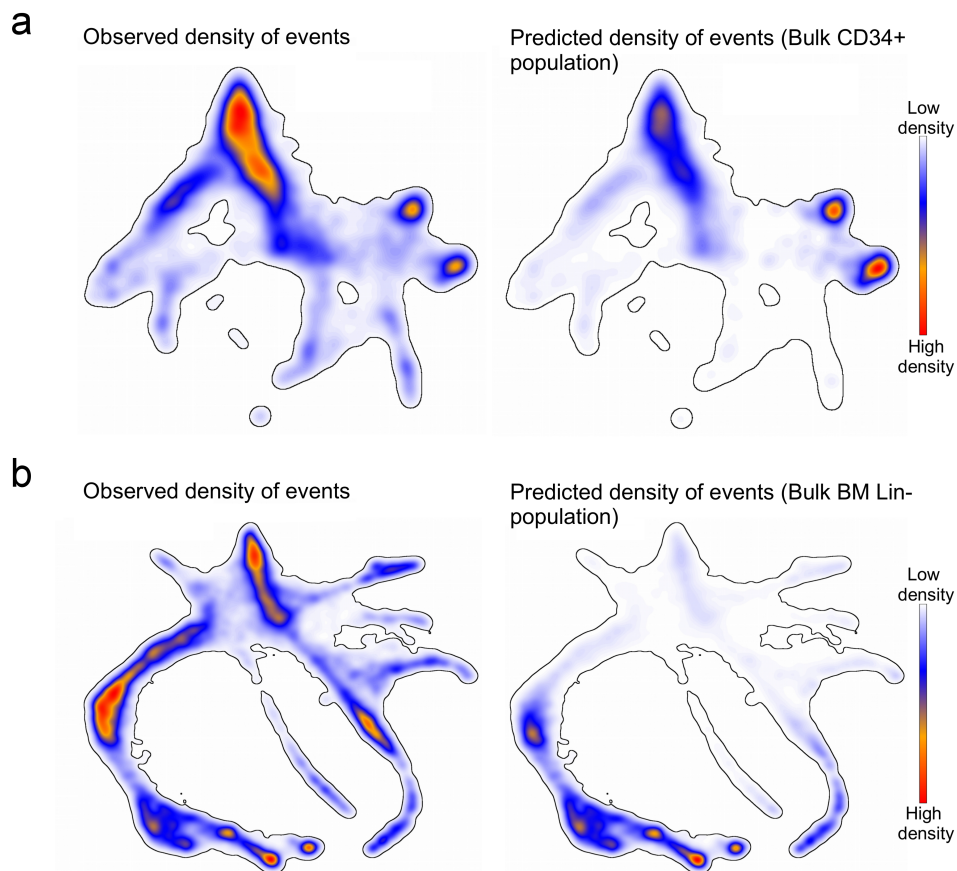

**Supplementary Figure 1 | Observed and predicted cell density estimations by means of nonparametric kernel method.** Observed (left) and predicted (right) cell density estimation for the transcriptome maps of a) sorted HSPCs and b) sorted Lin-CD34/CD164 cells. Details for the generation of this figure are provided in the Supplementary Table 2.



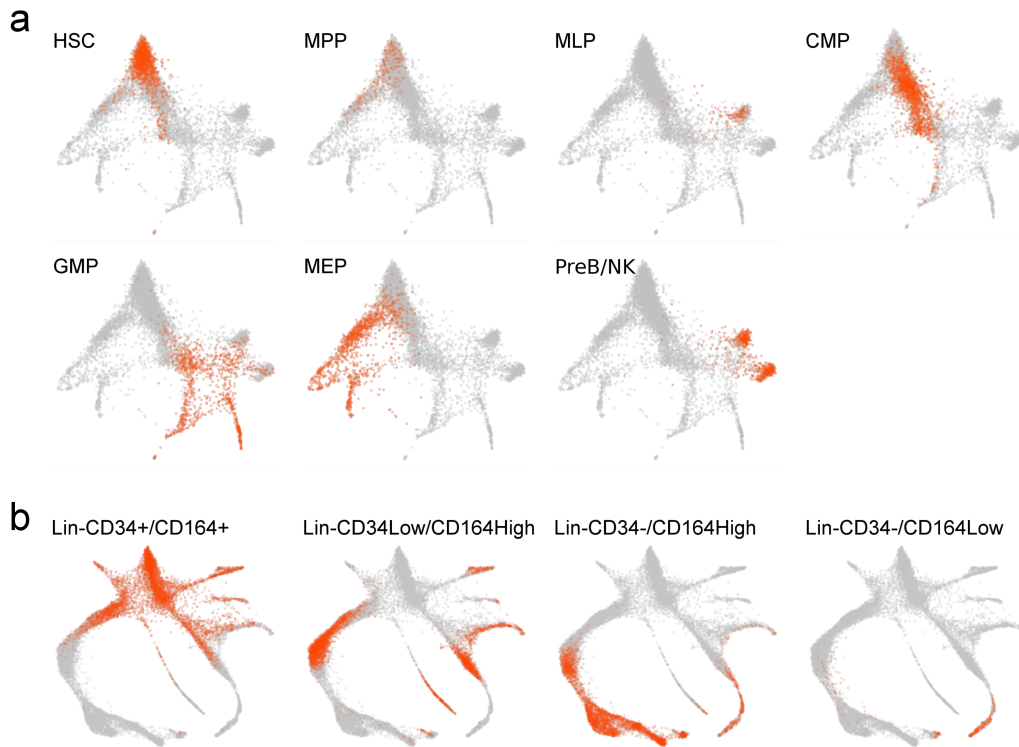

**Supplementary Figure 2 | Visualization of the sorted subpopulations on the SPRING graphs.** The FACS-sorted cell fractions have been individually highlighted in orange on the corresponding SPRING graphs. a) The seven sorted HSPC subpopulations. b) The four fractions isolated in Lin-CD34/CD164 cells.

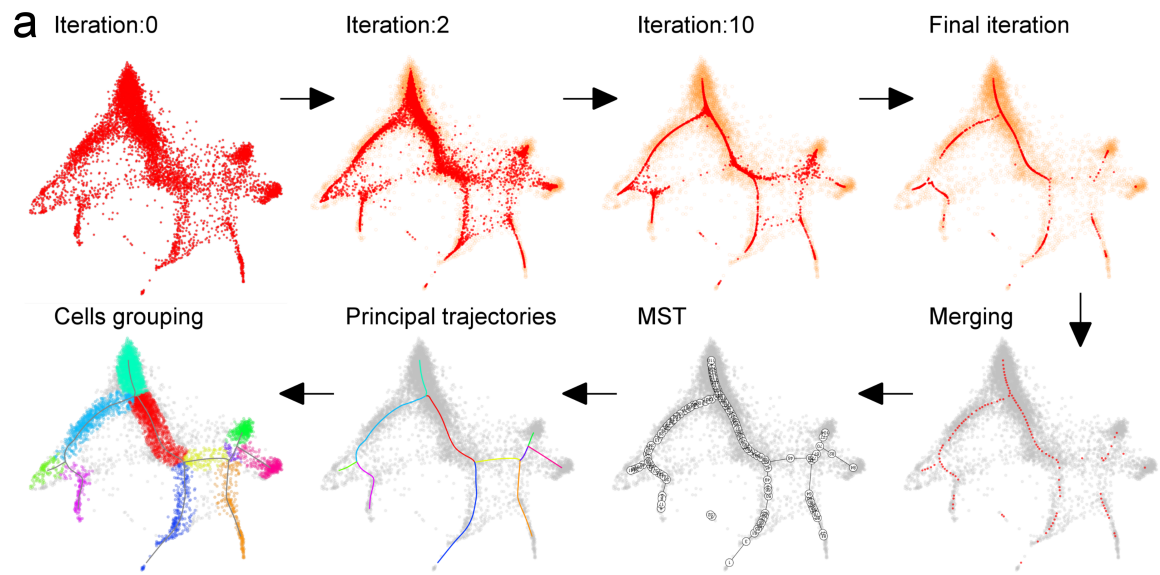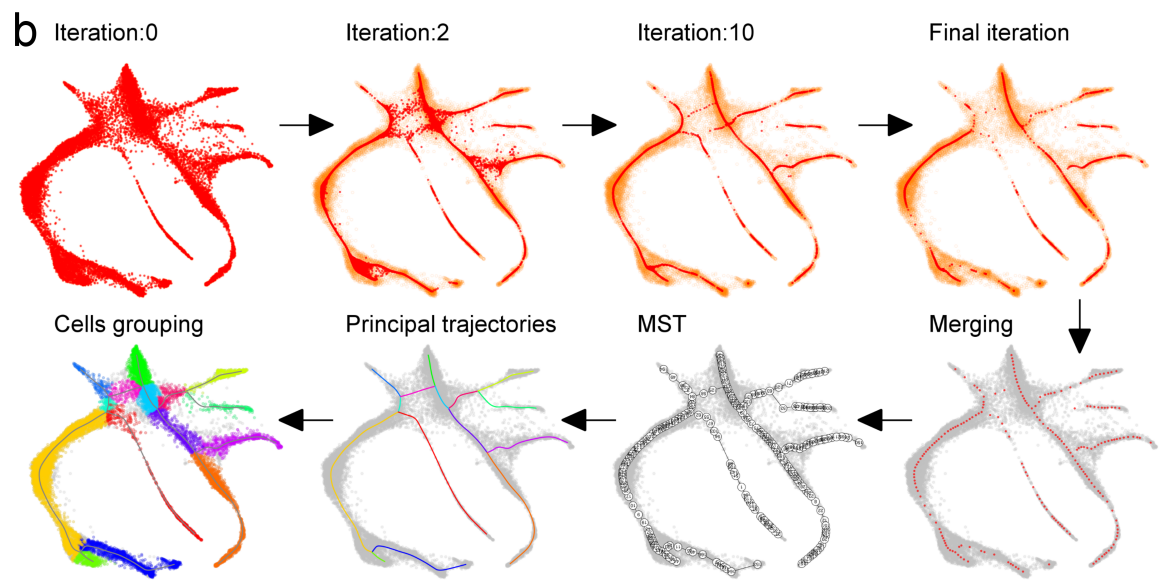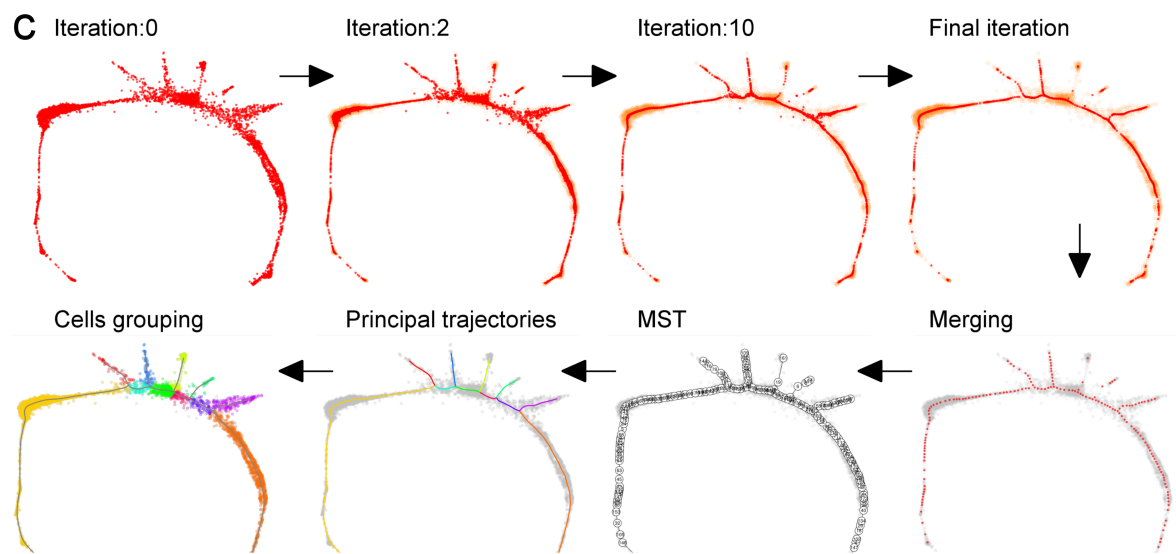

**Supplementary Figure 3 | Transcriptional principal trajectories identification procedure.** Graphical representation of key intermediate steps underlying the estimation of principal trajectories for the transcriptomes of a) sorted HSPCs, b) sorted Lin-CD34/CD164 cells and c) mouse Kit<sup>+</sup> cells. Graphs showing *Iteration:0*: consolidation points initialization; *Iteration:2*: and *Iteration:10*: consolidation points distribution after 2 and 10 iterations; *Final iteration*: estimated consolidation points distribution returned by structure-aware filtering algorithm; *Merging*: consolidation point set reduction by iterative merging; *MST*: branching reconstruction by Minimum Spanning Tree; *Principal trajectories*: segmentation of reconstructed skeleton; *Cells grouping*: cells-branch association.

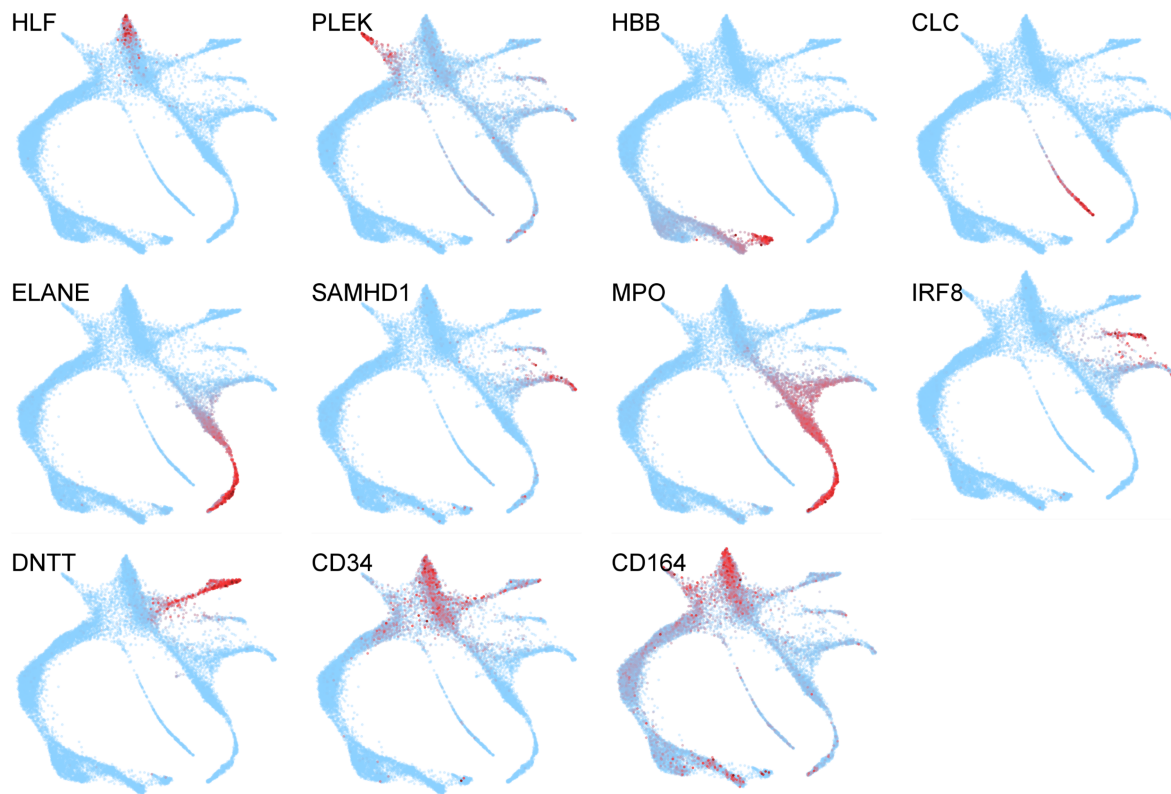

**Supplementary Figure 4 | Gene expression maps for relevant genes.** Lineage defining genes of the sorted Lin-CD34/CD164 cells: HLF, P; PLEK, Meg; HBB, E; CLC, BEMP; ELANE, N; SAMHD1, M; MPO, undifferentiated granulocytes; IRF8, DC; DNTT, Ly. Other genes: CD34; CD164.

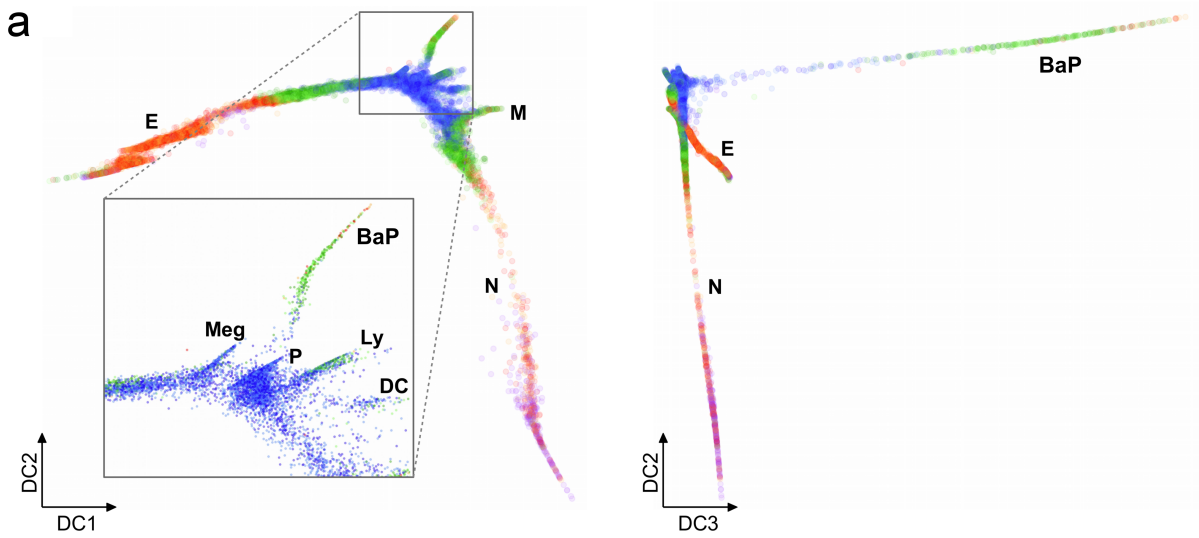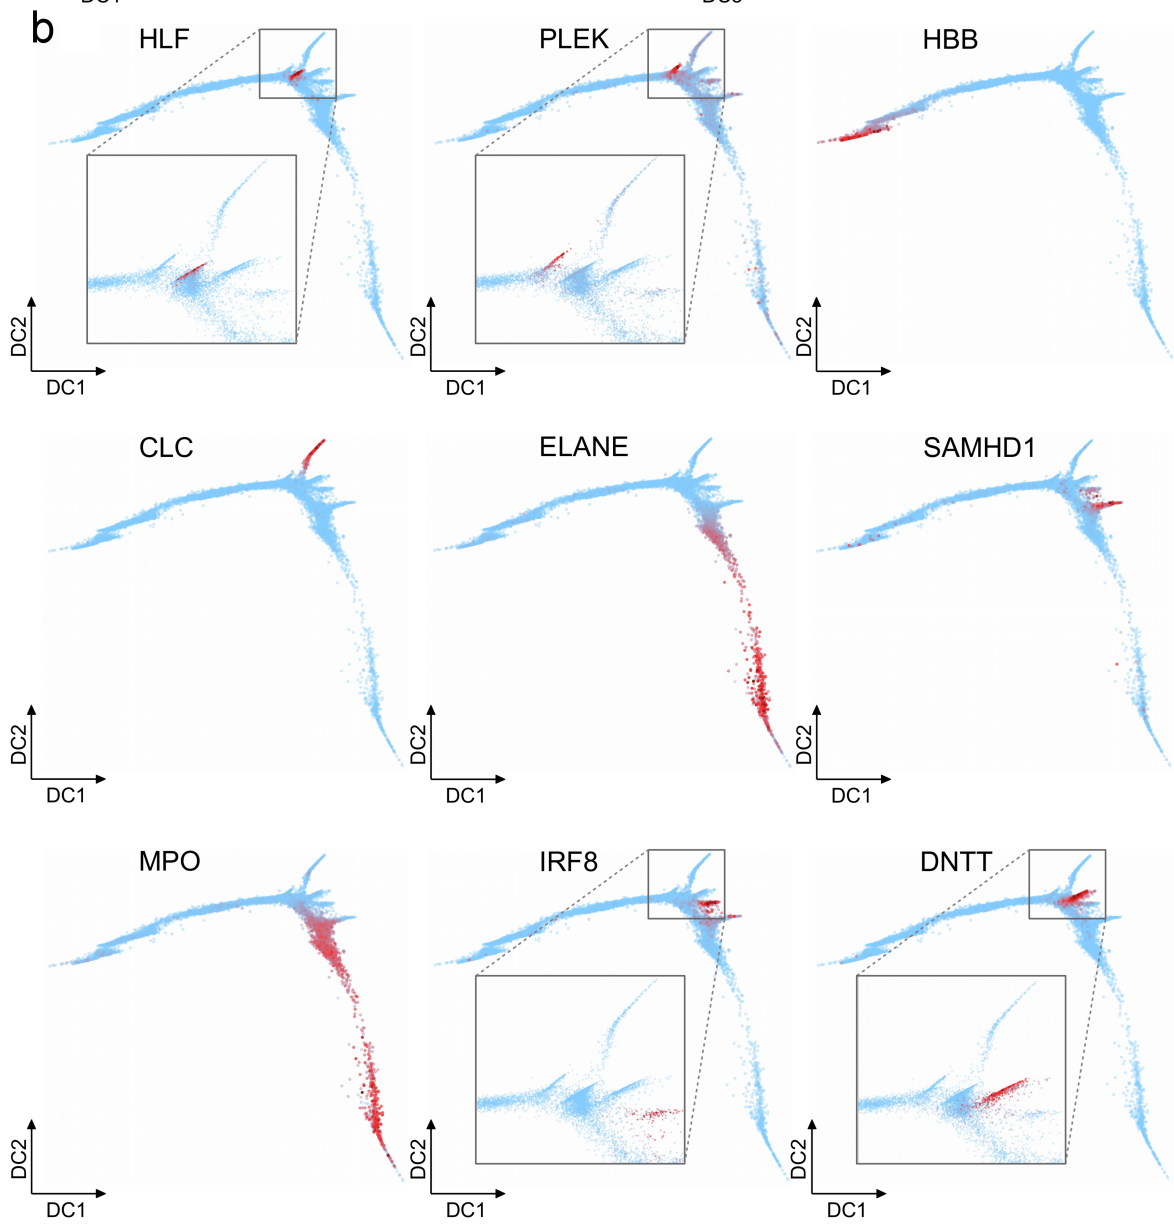

**Supplementary Figure 5 | Diffusion map representation for Lin-CD34/CD164 dataset. a)** Two views on the 3-dimensional diffusion map calculated. Diffusion map<sup>1</sup> tips have been labeled according to specific gene expression signatures reported in section **b)** and used also in Fig 2b and Supplementary Figure 4. Diffusion components 1 and 2 (DC1, DC2) capture lympho-myeloid and erythroid heterogeneity, whereas DC3 describes Baso-Eosinophil differentiation progression.

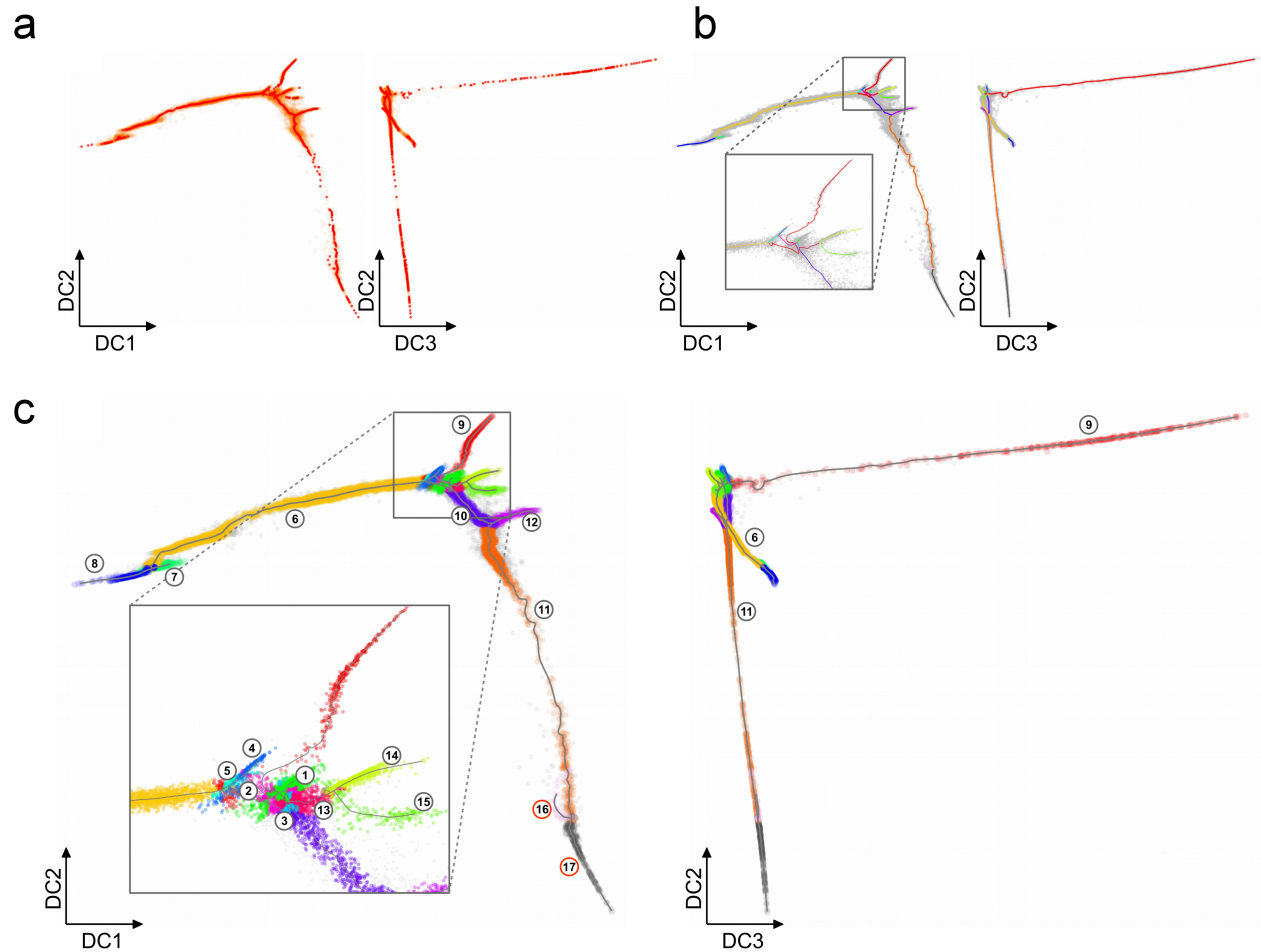

**Supplementary Figure 6 | Transcriptional principal trajectories identification procedure on diffusion map for Lin-CD34/CD164 dataset.** a) Estimated consolidation points distribution returned by structure-aware filtering algorithm; b) segmentation of reconstructed skeleton; c) cells-branch association. The procedure identifies 17 segments in total. Inferred skeleton and groups 1-15 closely recapitulate the results obtained starting from SPRING topology shown in Fig. 2d. Groups color code has been chosen according to Fig. 2d in order to facilitate the comparison.

**a**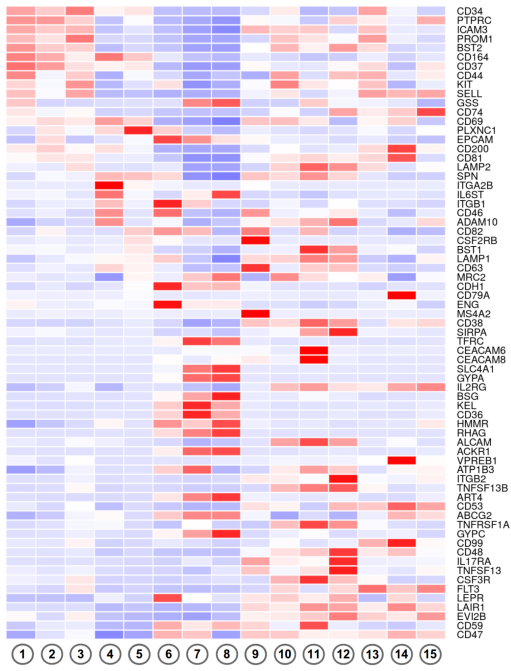**b**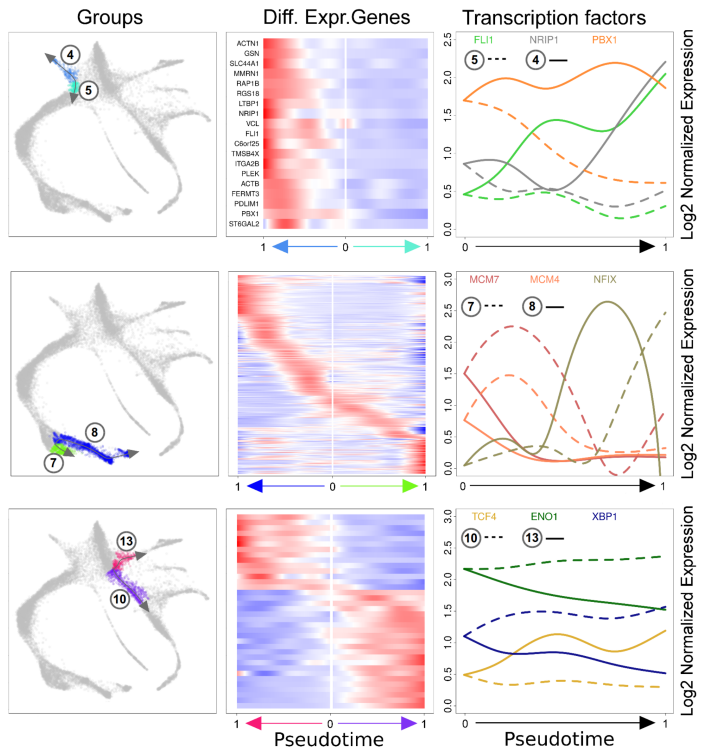**c**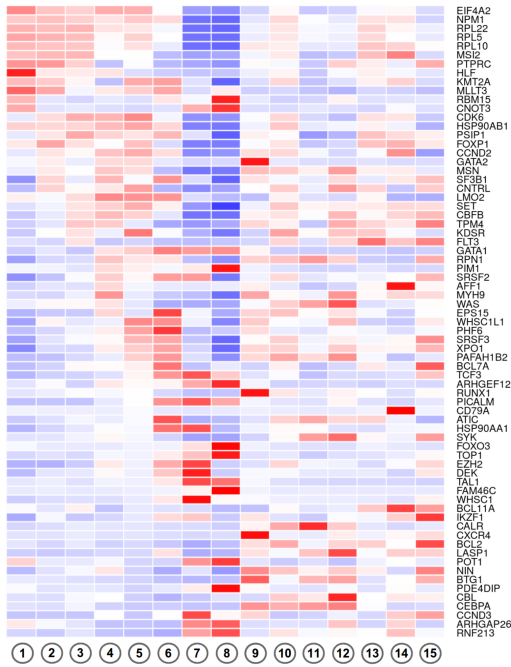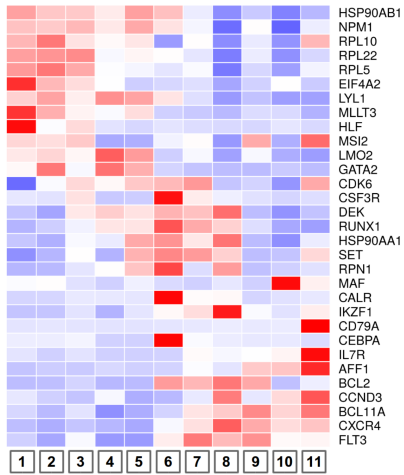



**Supplementary Figure 7 | Gene expression variation among branches and fate decision signatures in Lin-CD34/CD164 transcriptome.** a) Heatmap representation of gene expression levels among cells groups shown in Fig 2d for significant genes (LRT adjusted p-value <0.05, more details in Supplementary Information) known to code for CD markers<sup>2</sup>. Individual gene expression data have been row normalized among groups during heatmap generation. b) Gene dynamics associated to branching and fate decisions. The following comparisons are shown: 4 vs 5, 7 vs 8 and 10 vs 13. Columns report respectively: branching and groups considered (left); heatmaps of expression regression curves for genes showing a statistically significant difference (central); three significant transcription factors (right). c) Heatmaps for significant proto-oncogenes (LRT adjusted p-value <0.05, more details in Supplementary Information) with documented activity relevant to blood cancer according to COSMIC catalogue<sup>3</sup> among groups identified in sorted Lin-CD34/CD164 cells (left) and sorted HSPCs (right).

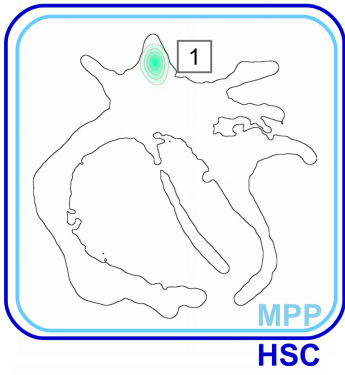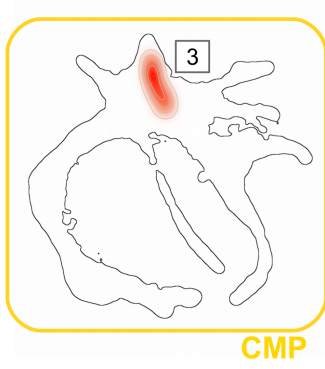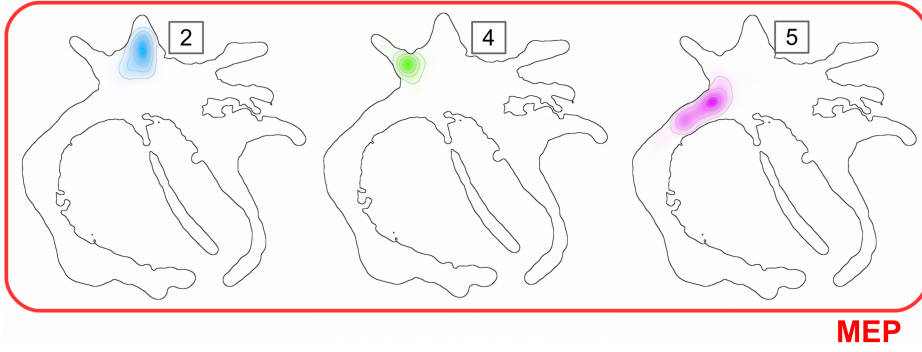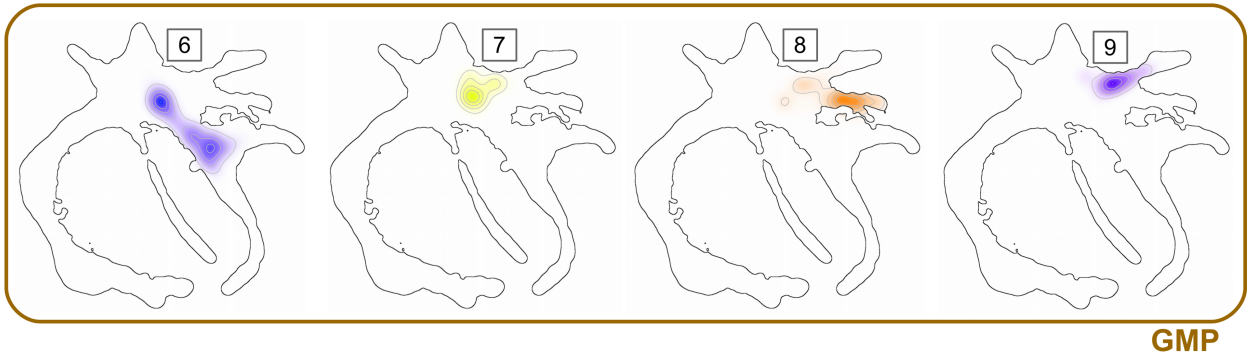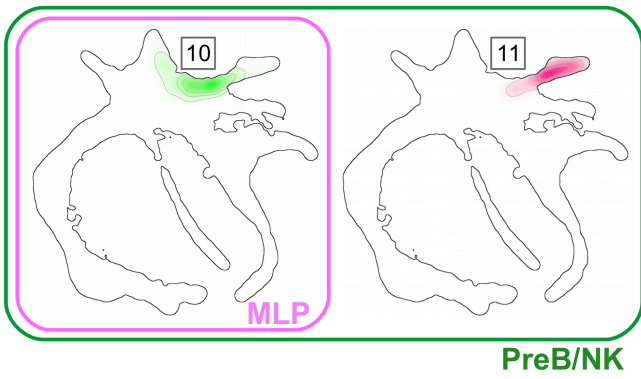

**Supplementary Figure 8 | Projection of computationally identified groups from the HSPCs map onto the Lin-CD34/CD164 topology.** Each cells group derived from principal trajectories identification analysis of the sorted Lin-HSPCs has been projected on Lin-CD34/CD164 topology. The labels of the seven FACS-sorted subpopulations have been added.

**a**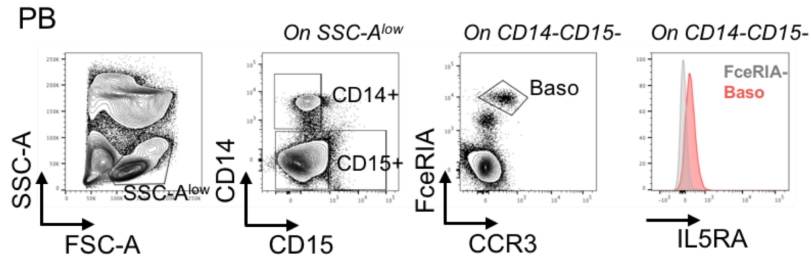**b**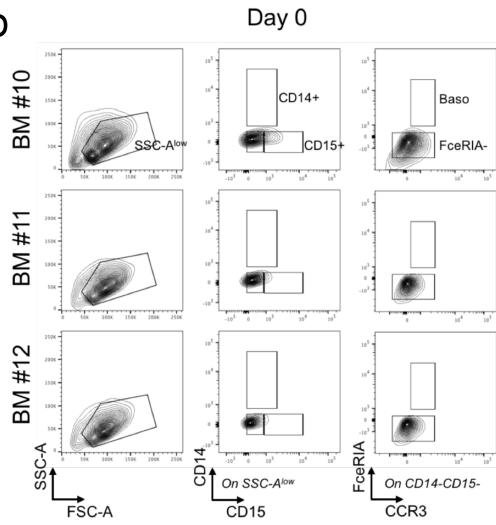**c**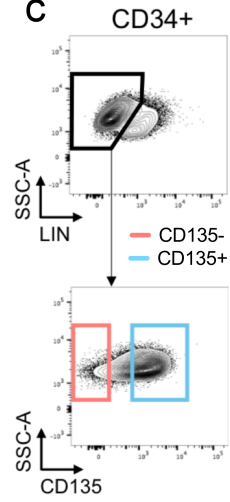**d**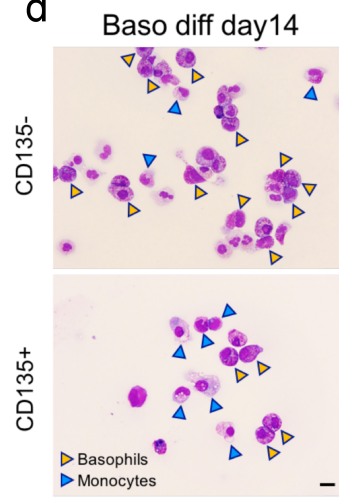**e**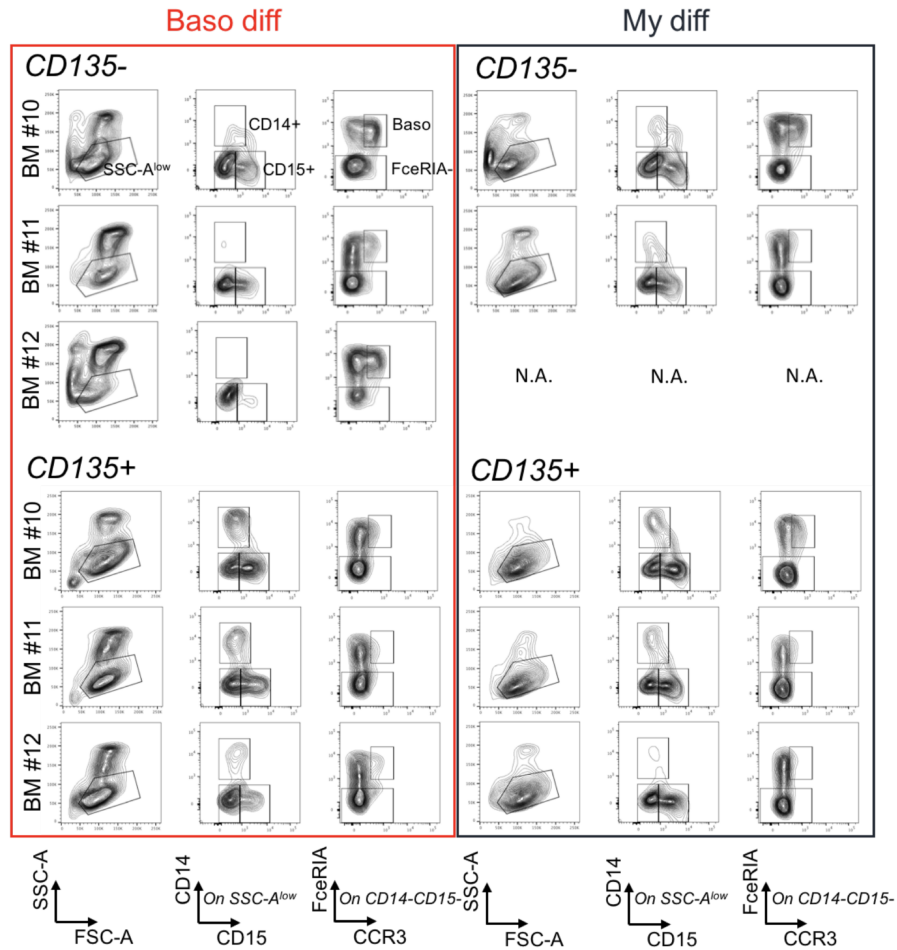

**Supplementary Figure 9 | Characterization of basophils in human peripheral blood and upon in vitro differentiation.** a) Gating strategy developed for the identification and definition of basophils in the human peripheral blood. In the SSC-A low population, the fraction of CD14-CD15- cells was selected and investigated for the expression of FcεRI and CCR3. The double positive FcεRI+CCR3+ population has been defined as Basophils (Baso). This was confirmed by the IL-5RA expression in the Baso (red pick's shift) with respect to the control FcεRI- population (gray pick). b) Cytometric analyses of CD34+ cells from 3 independent BM using the gating strategy described in a). c) Giemsa staining of Lin-CD34+CD135- and Lin-CD34+CD135+ cells FACS-sorted from the 3 BM described in b) and cultured in basophil (Baso) differentiation culture. Basophils and Monocytes are indicated respectively with orange and blue arrow heads. Scale bar, 20µm. d) FACS plots showing the presence of basophils mostly in CD135- cells but CD135+ cells from the 3 BM described in b) upon differentiation in Baso differentiation culture (left panel). As control, the same cytometric analysis was performed upon My differentiation culture (right panel).

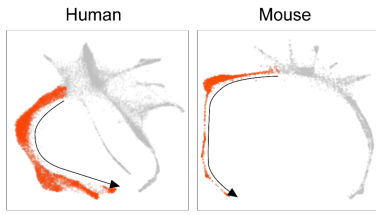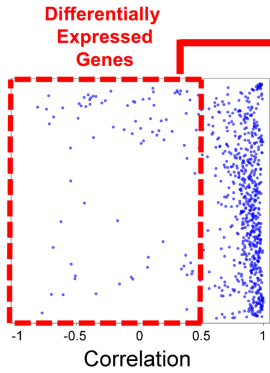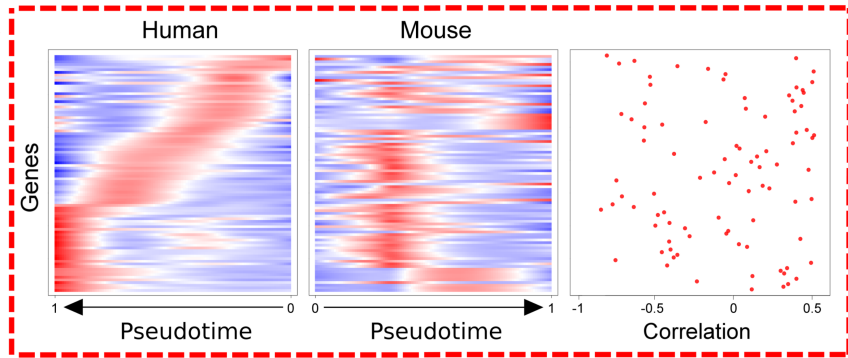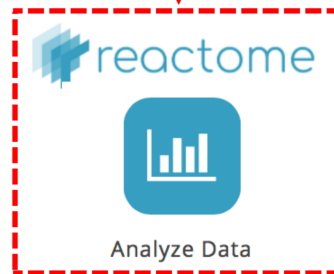

| Pathway name                          | Entities found | Entities pValue | Entities FDR |
|---------------------------------------|----------------|-----------------|--------------|
| Translation *                         | 11             | 5.01E-05        | 0.0325       |
| COPI-mediated anterograde transport   | 6              | 0.000155        | 0.0335       |
| Mitochondrial translation termination | 5              | 0.000736        | 0.0846       |
| Mitochondrial translation elongation  | 5              | 0.000736        | 0.0846       |
| Mitochondrial translation initiation  | 5              | 0.000809        | 0.0846       |
| Mitochondrial translation             | 5              | 0.00106         | 0.0846       |
| RUNX1-regulated transcription         | 5              | 0.00125         | 0.0846       |
| RNA Polymerase I Chain Elongation     | 4              | 0.00134         | 0.0846       |
| ...                                   | ...            | ...             | ...          |

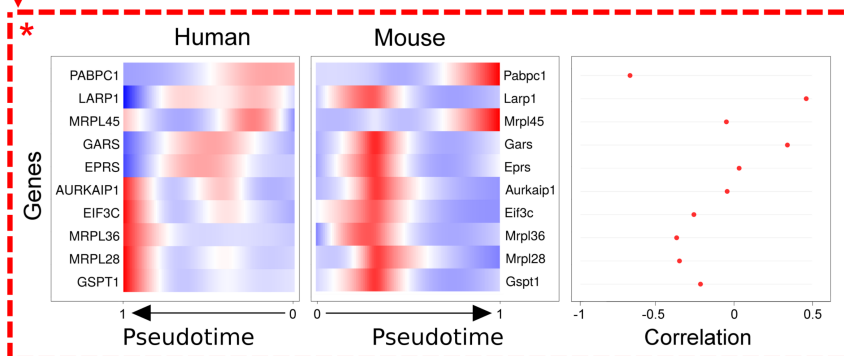

**Supplementary Figure 10 | Focus on low-or-negative correlated genes among human and mouse erythropoiesis.** Mirror heatmaps representing estimated regression curves for 89 orthologous genes exhibiting a low-or-negative correlation (Pearson correlation $<0.5$ ). Performing enrichment analysis by means of the Reactome pathway database tool<sup>4</sup>, we found the *Translation* pathway as significantly over-represented (p-value: 5.01E-5). In the bottom dashed rectangle, a specific mirror heatmap for gene hits is shown.

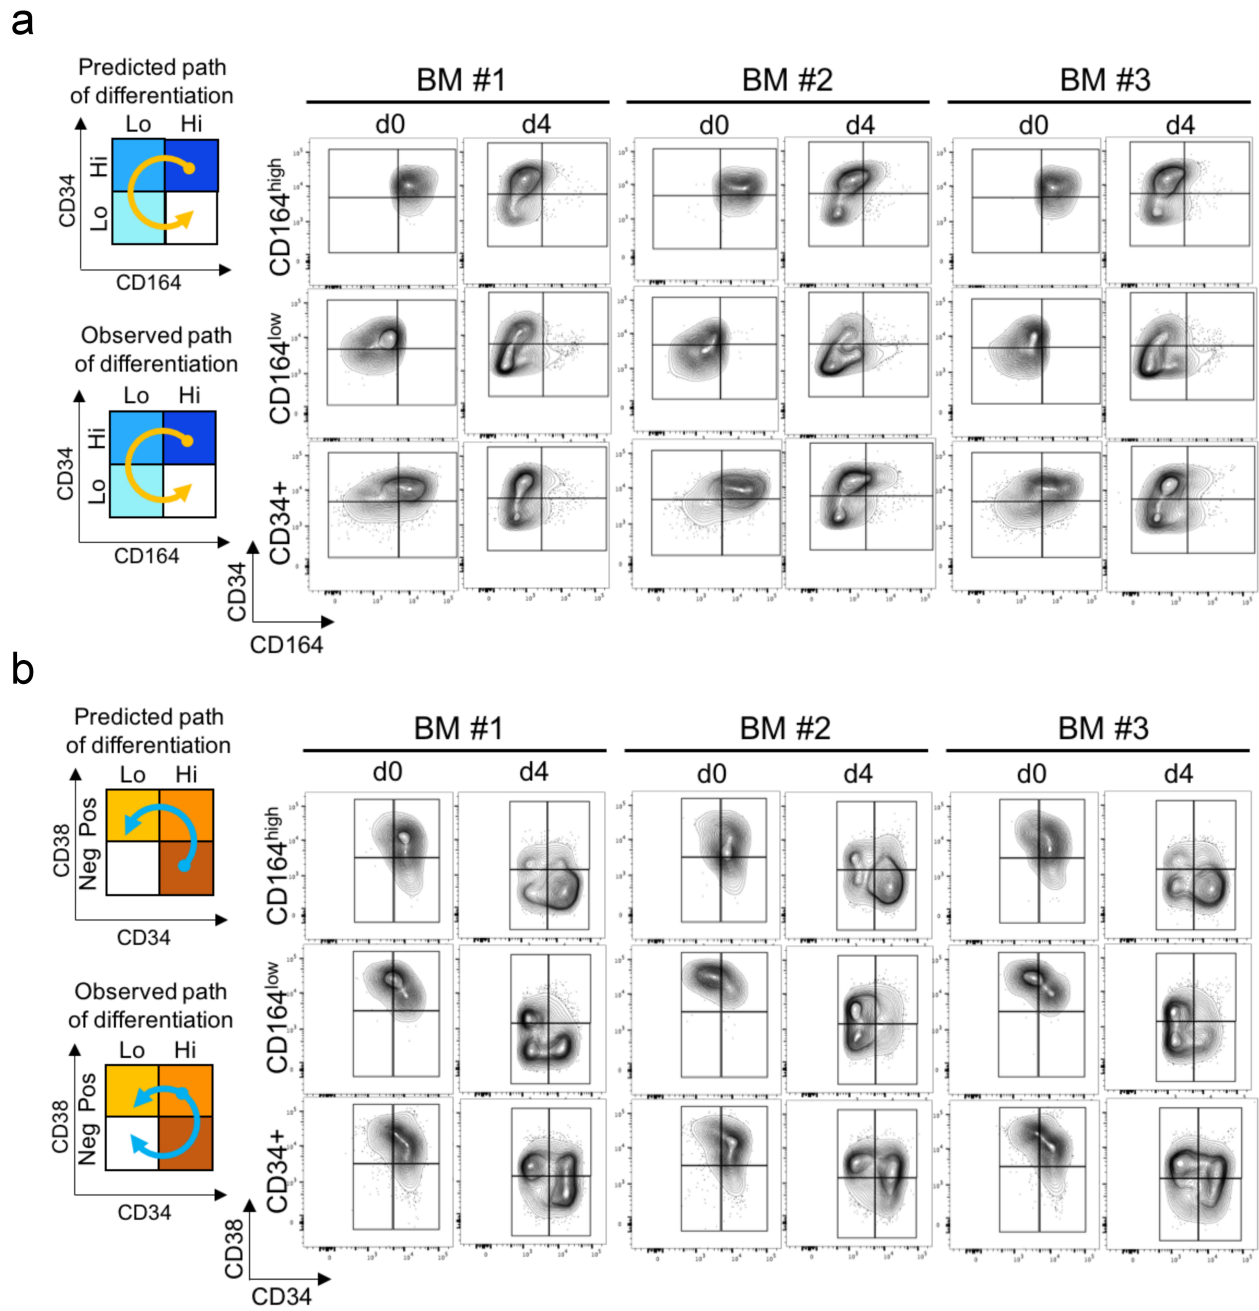

**Supplementary Figure 11 | Cytometric analysis of CD38 and CD164 expression upon expansion culture.** a) FACS plots showing the expression of CD164 with respect to CD34 and b) of CD38 with respect to CD34 in sorted CD34+CD164<sup>high</sup> and CD34+CD164<sup>low</sup> populations, at day 0 and day 4 in expansion culture. CD34+ cells were also analysed. Shown are 3 independent BM. Left schemes represent the predicted path of differentiation from the most primitive fractions of a) CD34<sup>high</sup>CD164<sup>high</sup> cells and b) CD34<sup>high</sup>CD38<sup>neg</sup> cells. Shown are also the schemes of the observed paths of differentiation.



**a**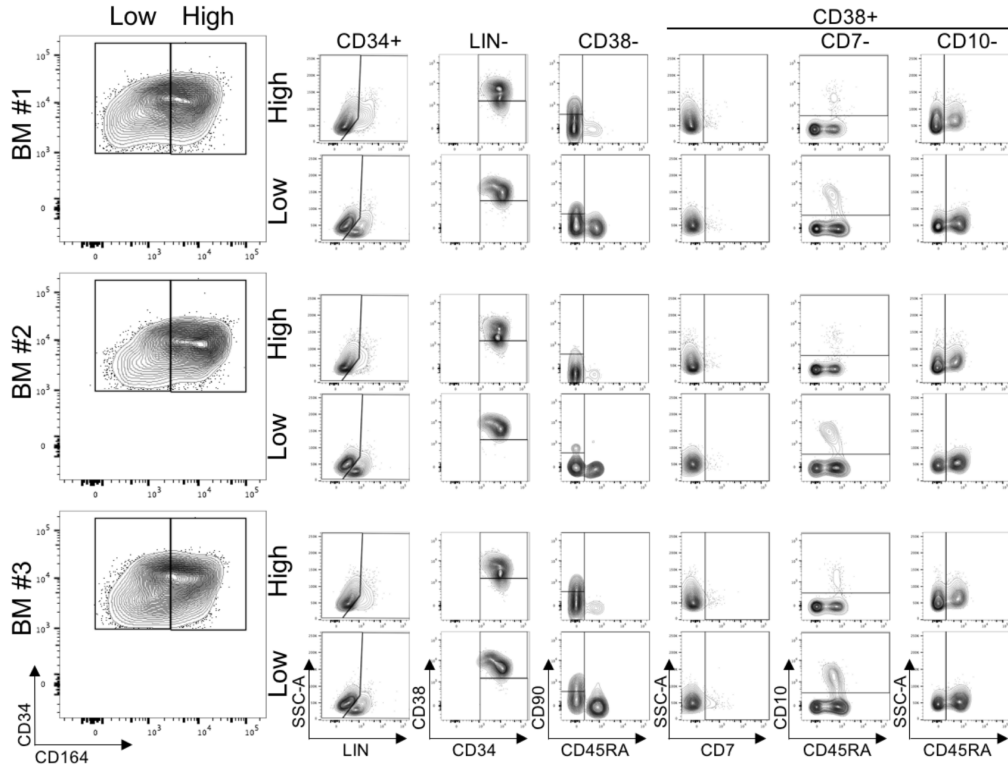**b**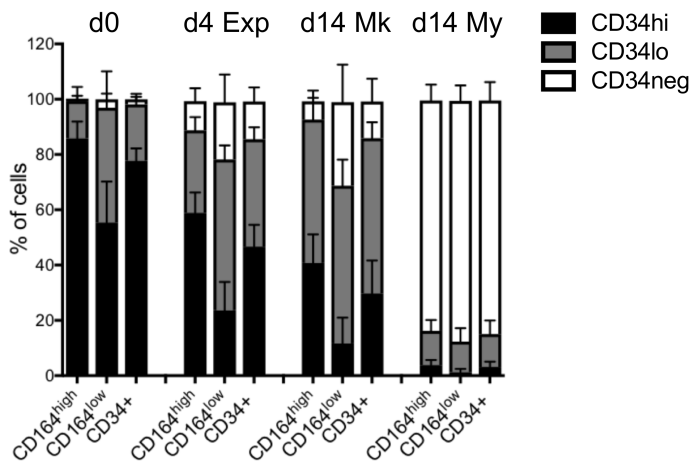**c**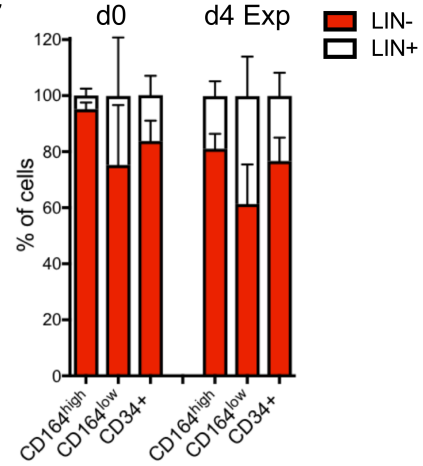**d**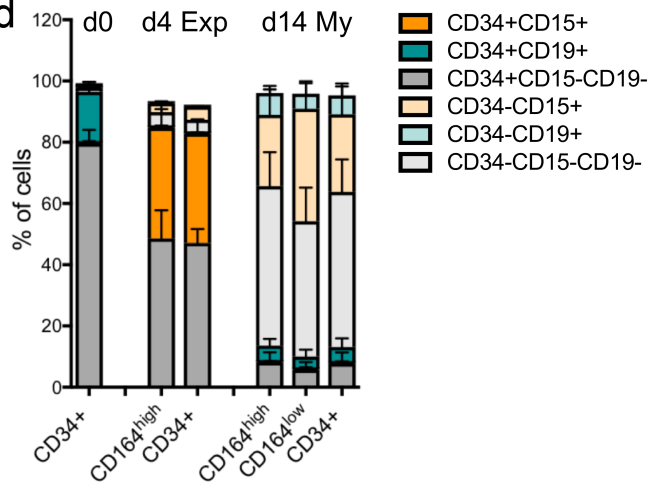**e**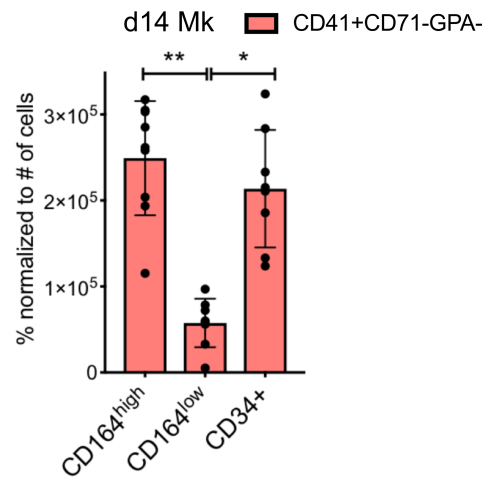

**Supplementary Figure 12 | Additional data on immunophenotyping and in vitro functional assays.** a) Immunophenotyping. FACS plots showing the content of Lin-/+ cells and HSPC subsets in the CD164high and CD164low fractions of CD34+ cells from 3 independent BM. b-e) In vitro assays on sorted CD164high and CD164low populations, and on CD34+ cells. b) Fractions of CD34high, CD34low and CD34neg at day 0 and in differentiation states at day 4 in Exp culture, or at day 14 in Mk and My culture conditions. Shown are Mean  $\pm$  SD from 9 independent BM. c) Percentage of Lin- and Lin+ cells at day 0 and day 4 in Exp culture from 6 independent BM. Reported are Mean  $\pm$  SD. d) Bar graph showing the expression of lineage positive markers CD15 and CD19 in CD34+ and CD34- cell fractions at day 0, at day 4 in Exp culture and day 14 in My culture from 9 independent BM. Shown are Mean  $\pm$  SD. e) Percentage of CD41+CD71-GPA- cells normalized by the number of cells at the end of the megakaryocyte differentiation culture. Values are Mean  $\pm$  SD from 9 independent BM. Statistics by Student's t-test (\*p<0.0005, \*\*p<0.0001).

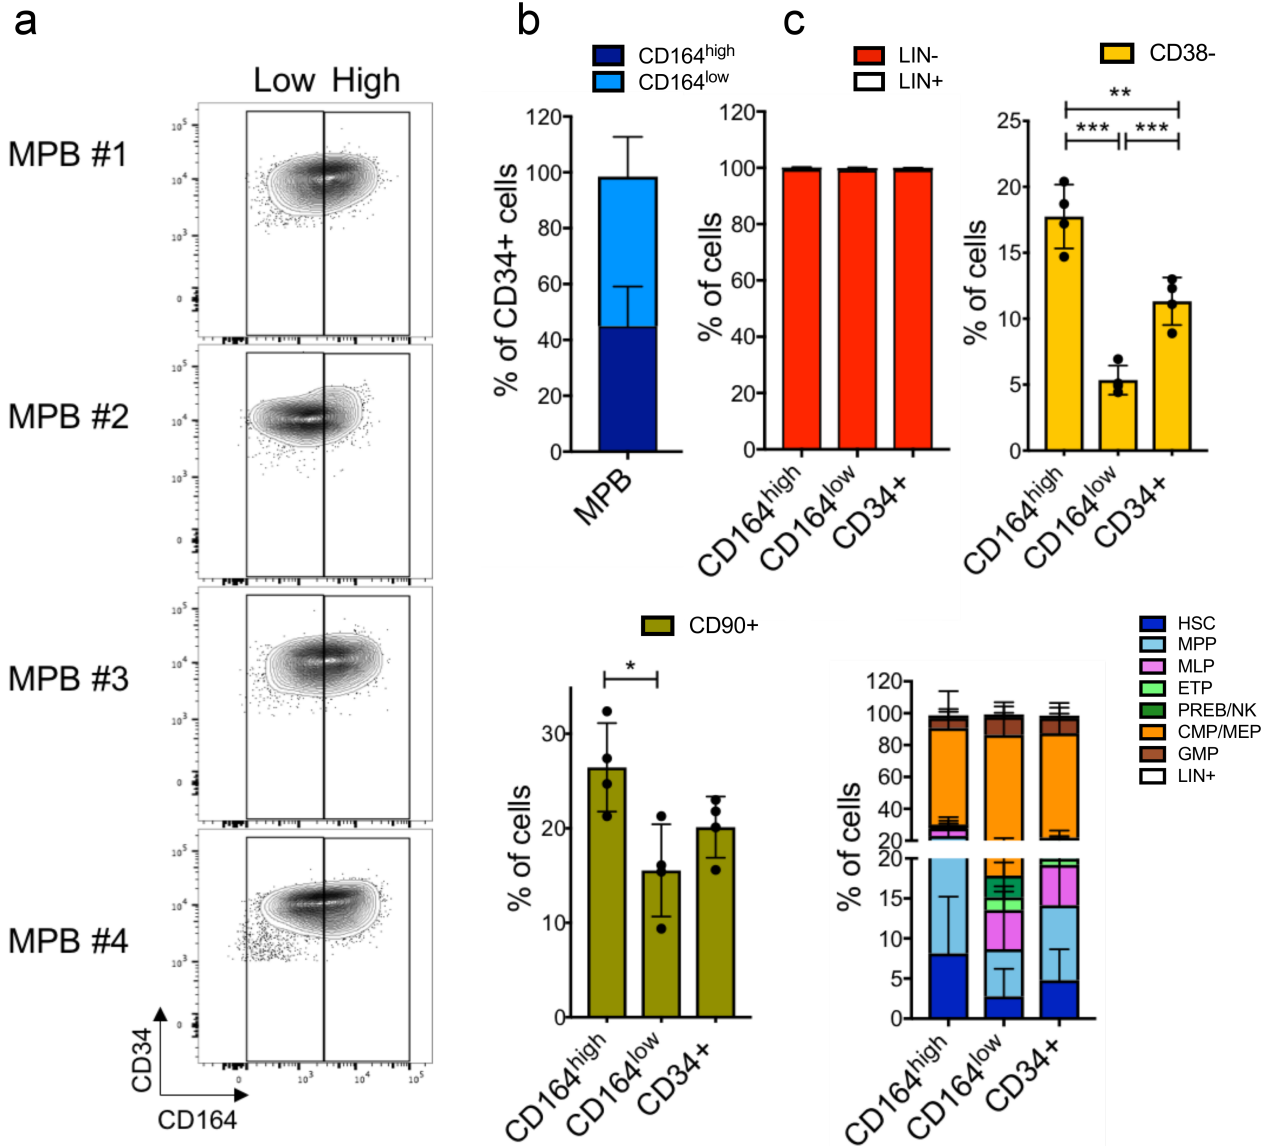

**Supplementary Figure 13 | Immunophenotyping of G-CSF MPB CD34+ cells from 4 healthy donors.** **a)** FACS plots showing CD164<sup>high</sup> and CD164<sup>low</sup> fractions in CD34+ cells from G-CSF MPB of 4 healthy donors. **b)** Bar graph showing the percentage of CD164<sup>high</sup> and CD164<sup>low</sup> fractions in MPB CD34+ cells. Values are Mean  $\pm$  SD. **c)** Bar graphs showing the content respectively of Lin-/+ , CD38-, CD90+ cells and HSPCs in CD164<sup>high</sup> and CD164<sup>low</sup> fractions, and in CD34+ cells. Values are Mean  $\pm$  SD. Statistics by Student t-test (\* $p$  < 0.05; \*\* $p$  < 0.01; \*\*\* $p$  < 0.005). For the HSPCs bar graph, statistics is provided in Supplementary Table 4.

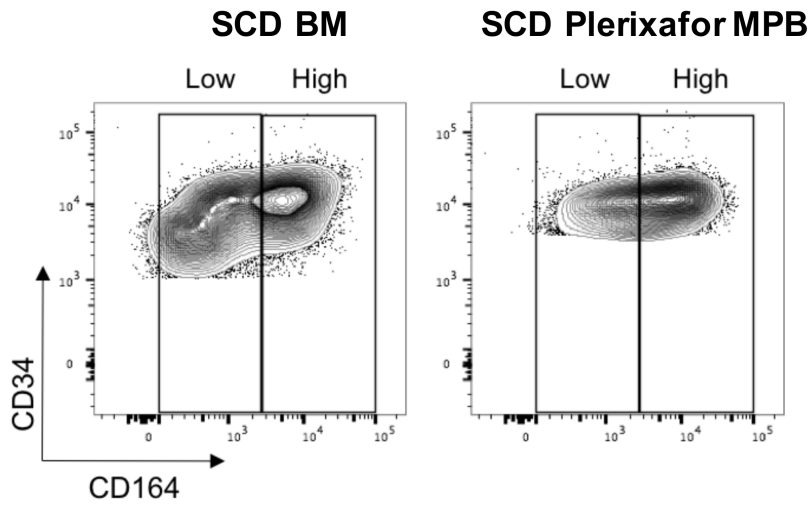

**Supplementary Figure 14 | CD164 expression in a Sickle Cell Disease (SCD) patient.** FACS plots showing CD164<sup>high</sup> and CD164<sup>low</sup> fractions in CD34<sup>+</sup> cells from respectively BM (left) and plerixafor MPB (right) of the same SCD patient.

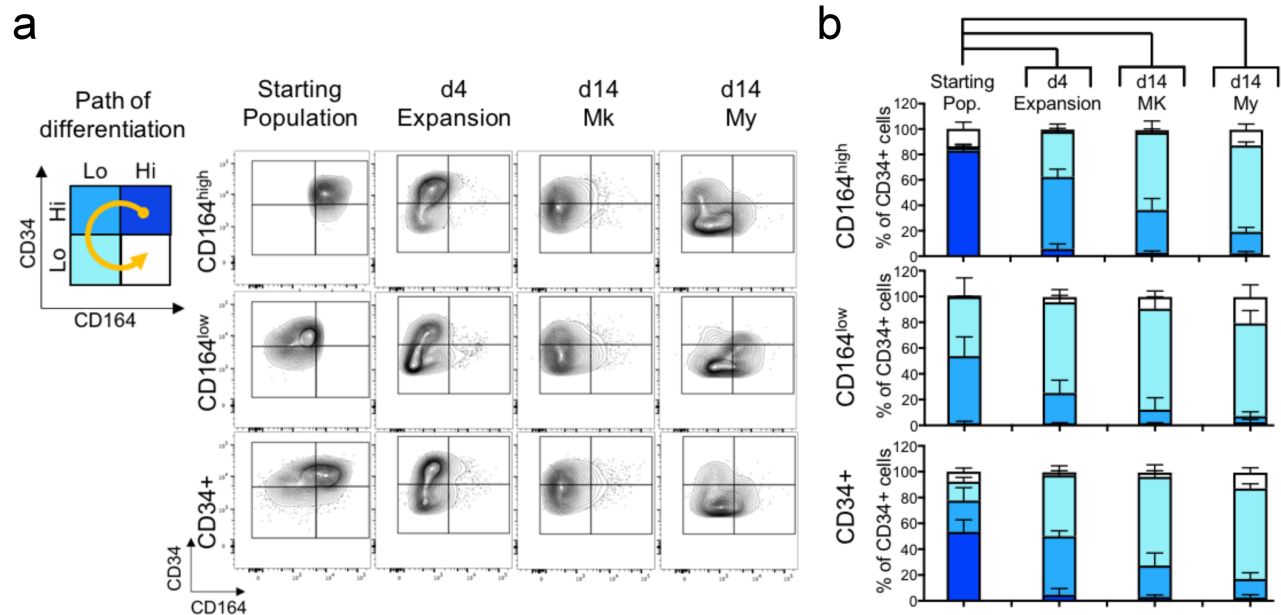

**Supplementary Figure 15 | Cytometric analysis of CD164 expression in different culture conditions.** **a)** FACS plots showing the cell phenotype at day 0 (Starting population) and in differentiation states at day 4 in Expansion culture, or at day 14 in Mk and My culture conditions. Top left, scheme representing the path of differentiation from the most primitive fraction of CD34<sup>high</sup>CD164<sup>high</sup> cells. **b)** Bar graphs summarizing the cytometric analysis described in a). The colour code used is the same of the scheme in a). Shown are Mean  $\pm$  SD from 9 independent BM.

**a**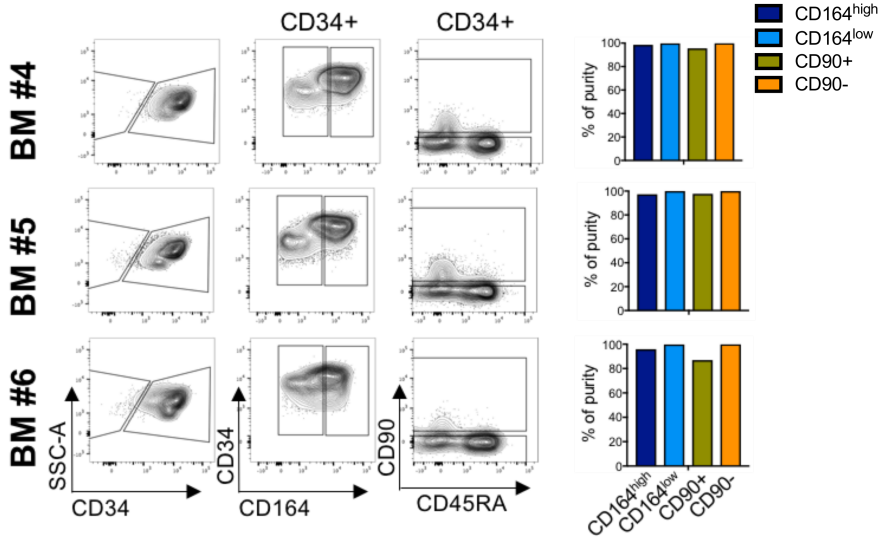**b**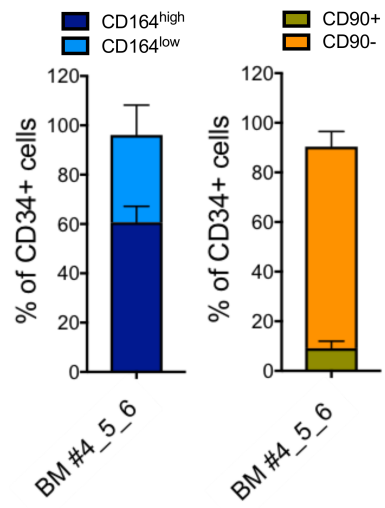**c**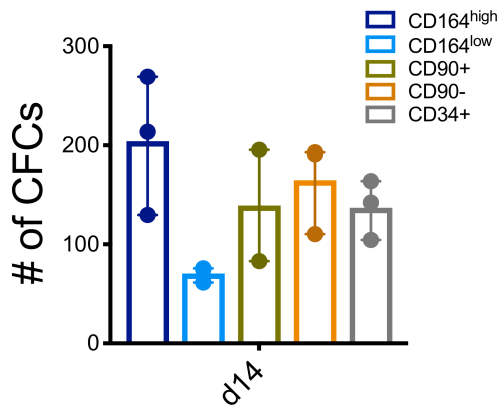**d**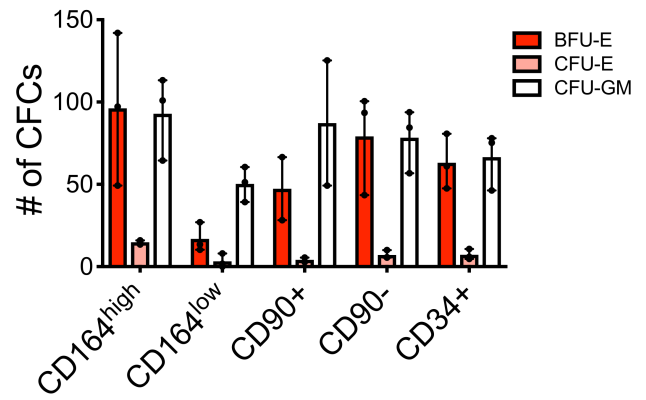**e**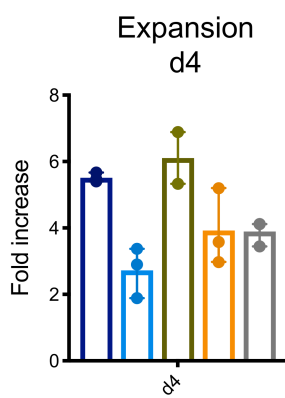**f**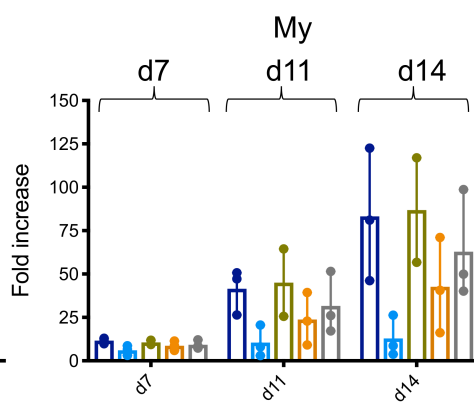**g**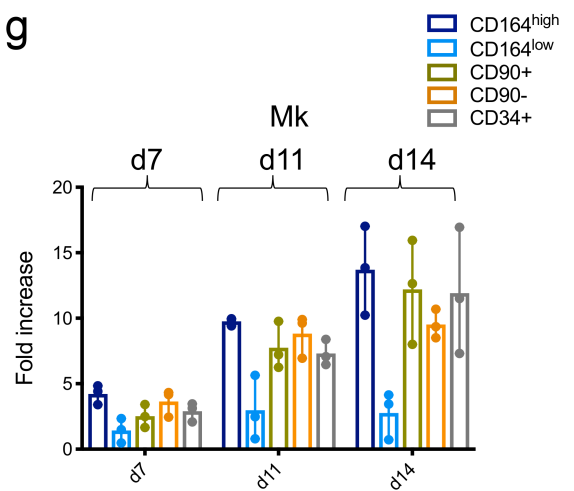

**Supplementary Figure 16 | In vitro functional assays of CD164 versus CD90 subsets FACS-sorted from BM CD34+ cells of 3 additional healthy donors. a)** Left: Gating strategy used to FACS-sort respectively CD164<sup>high/low</sup> fractions and CD90<sup>+/-</sup> fractions from BM CD34<sup>+</sup> cells of 3 independent healthy donors. Right: Bar graphs showing the percentage of purity of each sorted population. **b)** Percentage of CD164<sup>high/low</sup> fractions (left) and CD90<sup>+/-</sup> fractions (right) in CD34<sup>+</sup> cells. Shown are Median  $\pm$  Error. **c)** Bar graphs showing the total number and **d)** the type of CFCs scored at day 14 in a colony-forming assay (CFCs, Colony Forming Cells, BFU-E, Burst-Forming Unit-Erythroid cells, CFU-E, Colony-Forming Unit-Erythroid cells, CFU-GM, Colony-Forming Unit-Granulocyte/Macrophages). Shown are Median  $\pm$  Error. **e-g)** Bar graphs representing the growth rate of the sorted subsets and CD34<sup>+</sup> cells in **e)** Expansion medium, **f)** My, myeloid differentiation medium and **g)** Mk, Megakaryocyte differentiation medium. Values are Median  $\pm$  Error.

**a**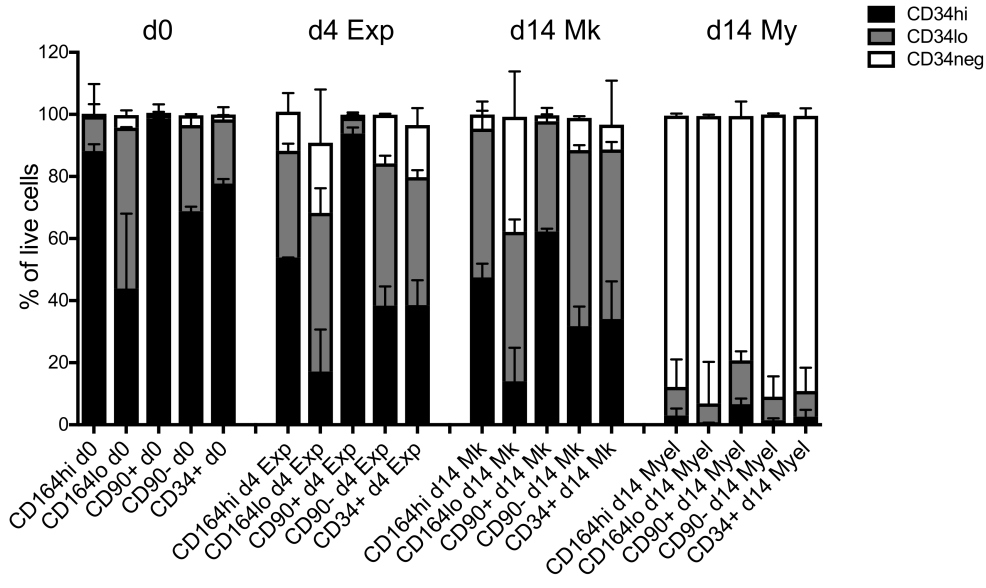**b**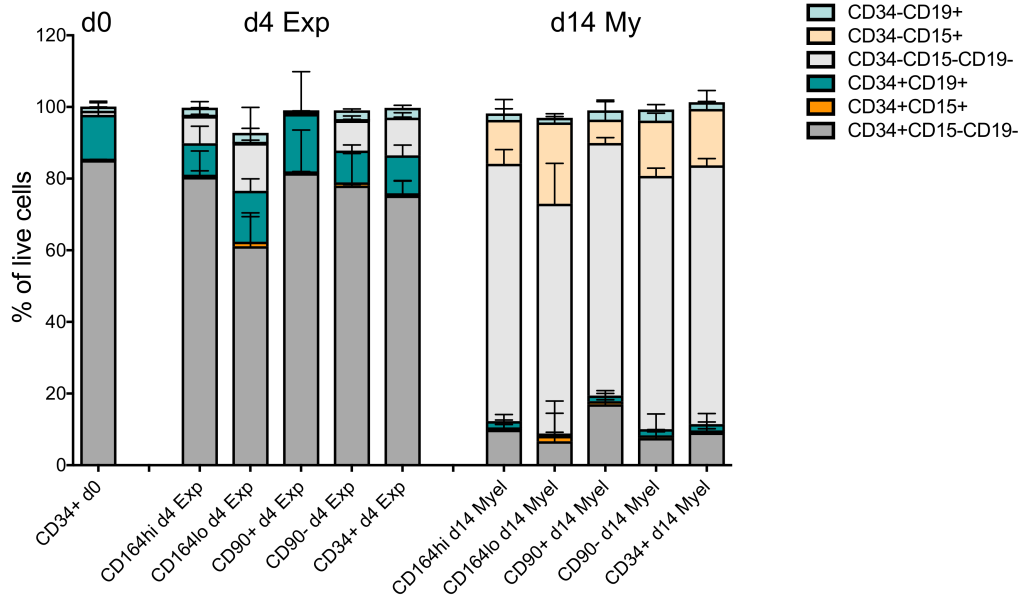**c**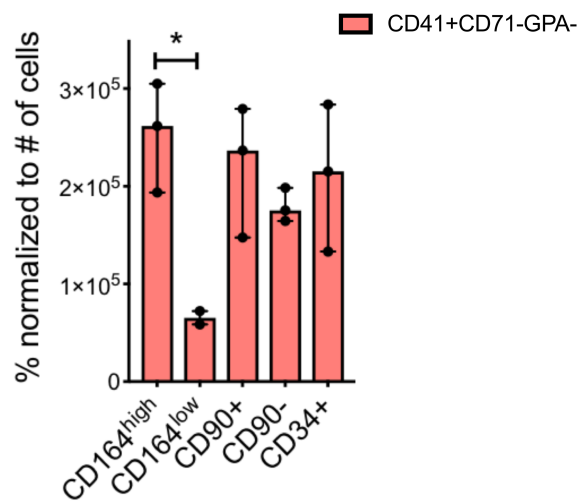



**Supplementary Figure 17 | Immunophenotypic profile of CD164 versus CD90 subsets upon in vitro functional assays of 3 additional healthy donors. a)** Percentage of CD34<sup>high</sup>, CD34<sup>low</sup> and CD34<sup>neg</sup> at day 0 and in differentiation states at day 4 in Expansion (Exp) medium, or at day 14 in Megakaryocyte (Mk) and Myeloid (My) culture conditions of the sorted CD164<sup>high/low</sup> fractions and CD90<sup>+/-</sup> fractions, and CD34<sup>+</sup> cells. **b)** Bar graph showing the expression of lineage positive markers CD15 and CD19 in CD34<sup>+</sup> and CD34<sup>-</sup> cell fractions at day 0, at day 4 in Exp culture and day 14 in My culture. **c)** Percentage of CD41<sup>+</sup>CD71<sup>-</sup>GPA<sup>-</sup> cells normalized to the number of cells at the end of the megakaryocyte differentiation culture. Values are Median  $\pm$  Error from 3 independent BM. Statistics by Student t-test (\* $p < 0.05$ ).

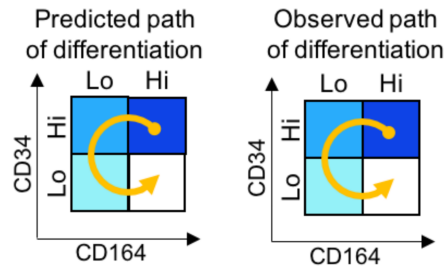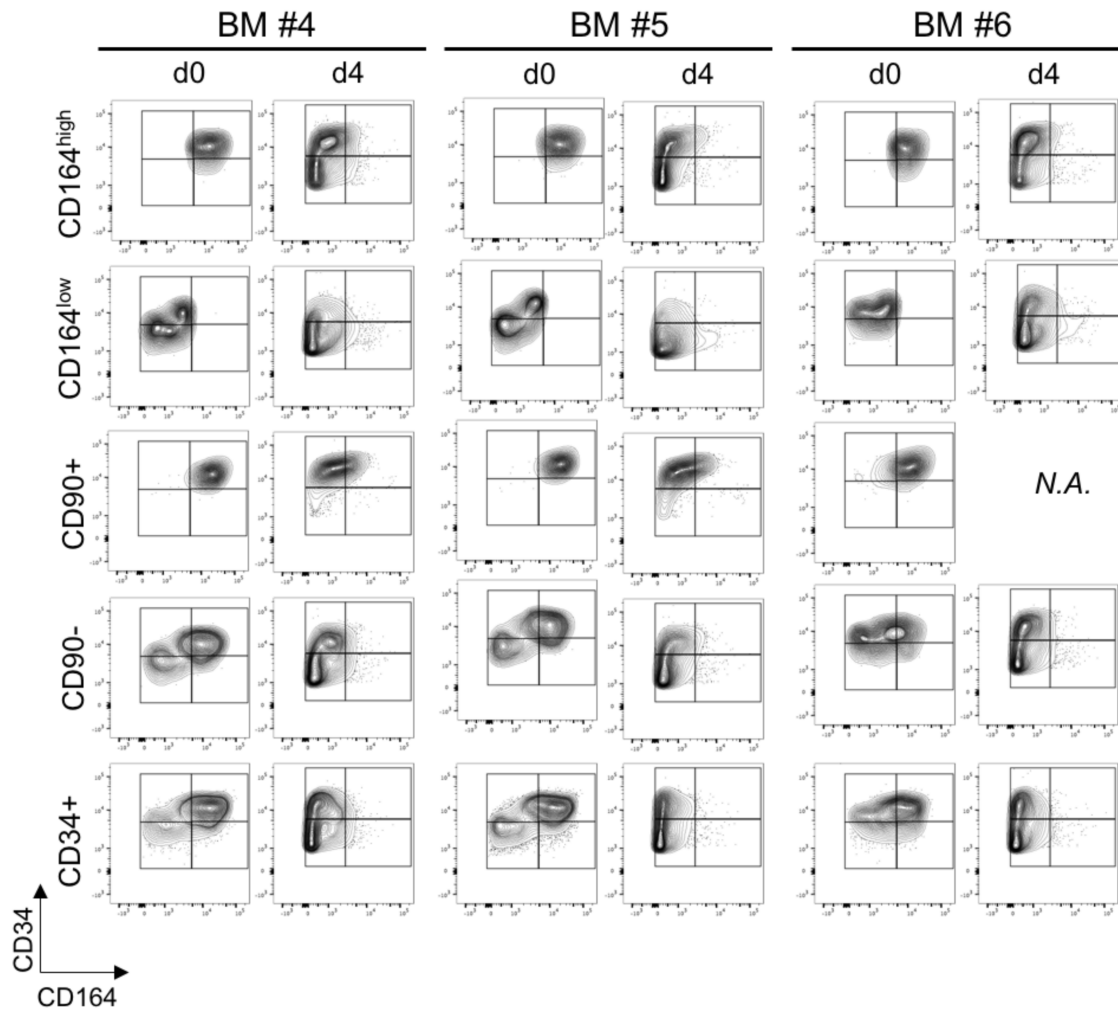

**Supplementary Figure 18 | Cytometric analysis of CD164 and CD34 upon expansion culture. a)** FACS plots showing the expression of CD164 with respect to CD34 in sorted CD164<sup>high/low</sup> fractions and CD90<sup>+/-</sup> fractions, and CD34<sup>+</sup> cells at day 0 and day 4 in expansion culture. Shown are 3 independent BM. Left scheme represents the predicted path of differentiation from the most primitive fraction of CD34<sup>high</sup>CD164<sup>high</sup> cells. The observed path of differentiation (right scheme) perfectly overlaps.

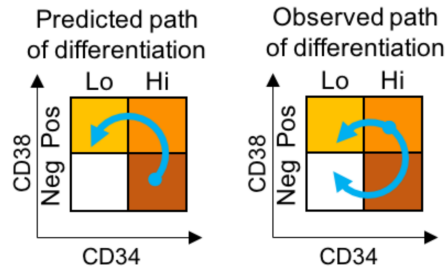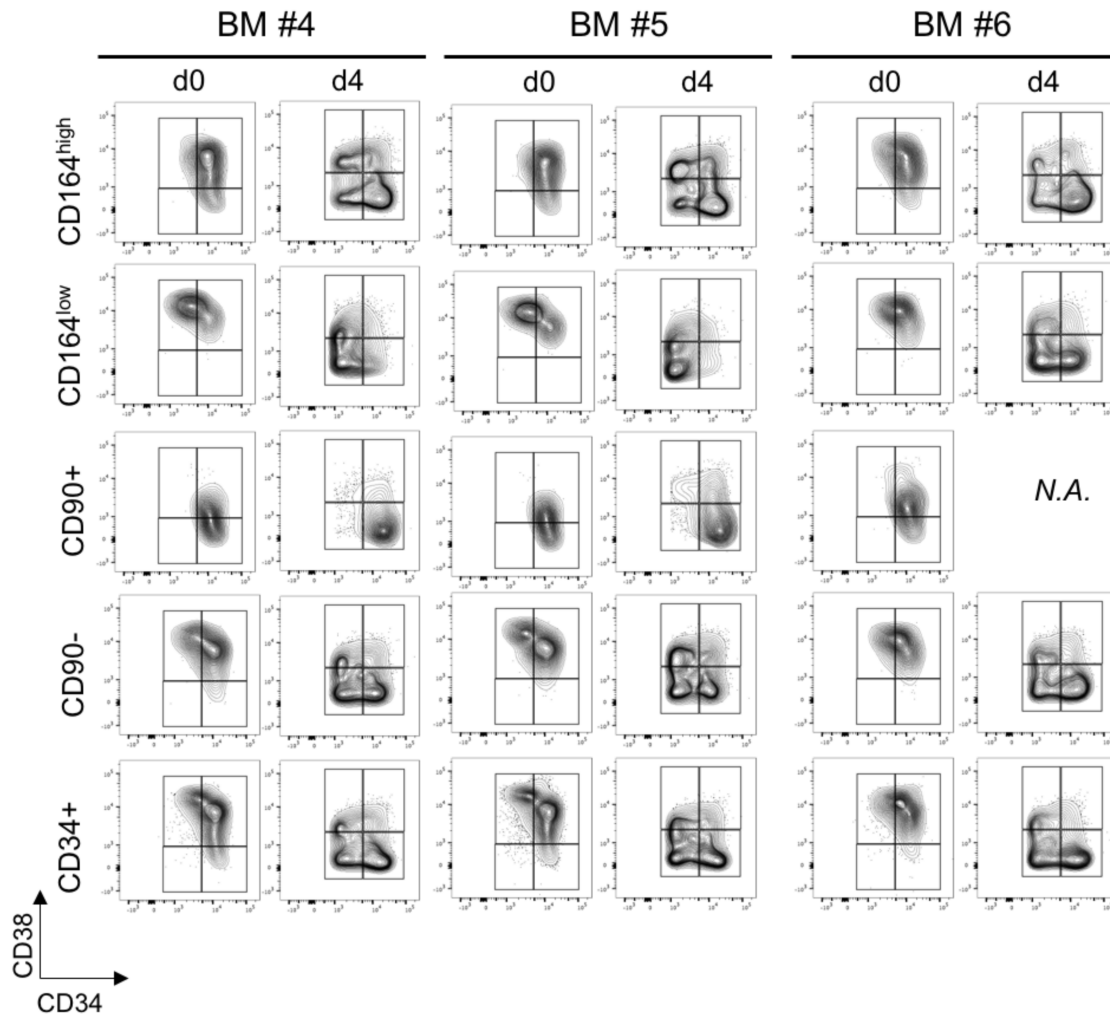

**Supplementary Figure 19 | Cytometric analysis of CD38 and CD34 upon expansion culture. a)** FACS plots showing the expression of CD38 with respect to CD34 in sorted CD164<sup>high/low</sup> fractions and CD90<sup>+/-</sup> fractions, and CD34<sup>+</sup> cells at day 0 and day 4 in expansion culture. Shown are 3 independent BM. Left scheme represents the predicted path of differentiation from the most primitive fraction of CD34<sup>high</sup>CD38<sup>neg</sup> cells. The observed path of differentiation (right scheme) does not overlap.

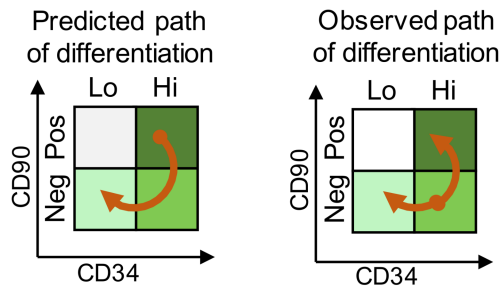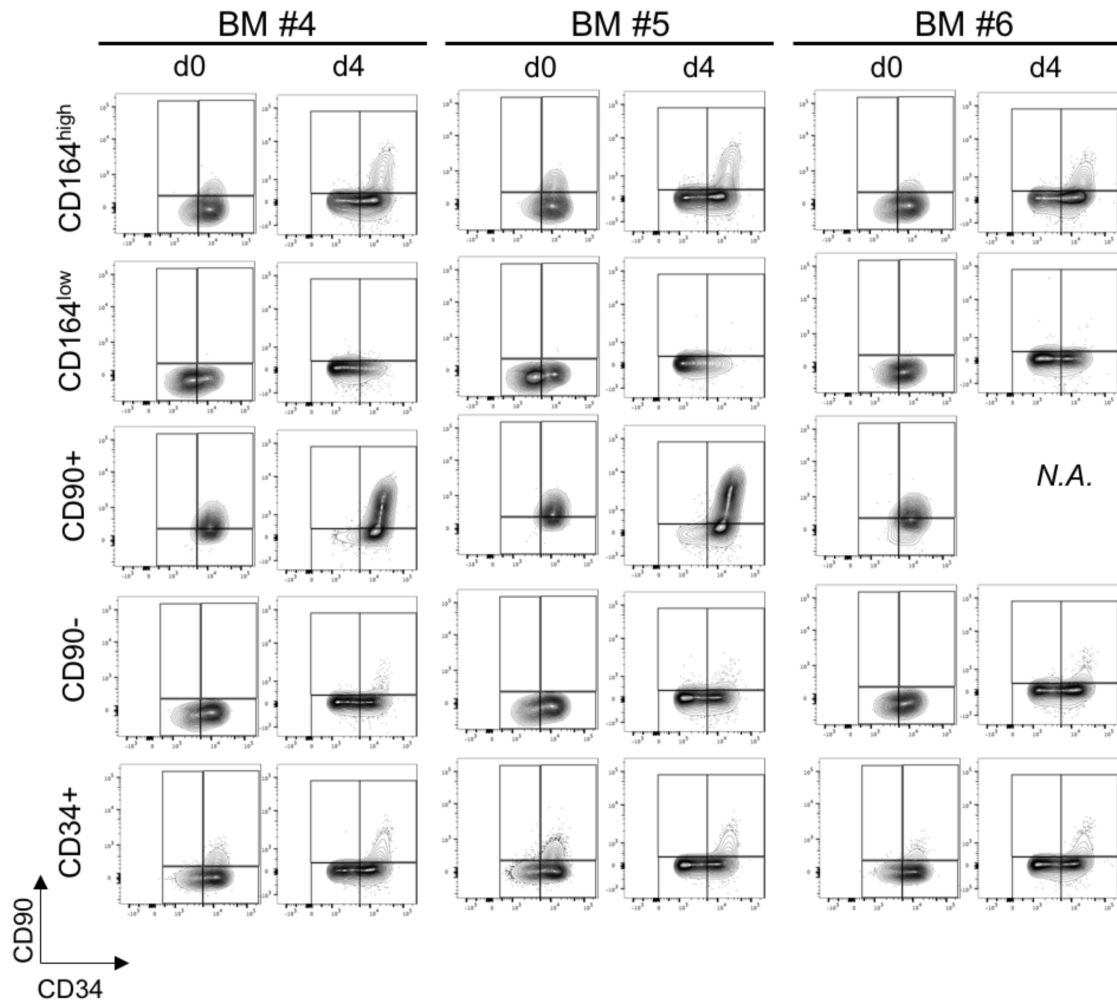

**Supplementary Figure 20 | Cytometric analysis of CD90 and CD34 upon expansion culture. a)** FACS plots showing the expression of CD90 with respect to CD34 in sorted CD164<sup>high/low</sup> fractions and CD90<sup>+/-</sup> fractions, and CD34<sup>+</sup> cells at day 0 and day 4 in expansion culture. Shown are 3 independent BM. Left scheme represents the predicted path of differentiation from the most primitive fraction of CD34<sup>high</sup>CD90<sup>pos</sup> cells. The observed path of differentiation (right scheme) does not overlap.

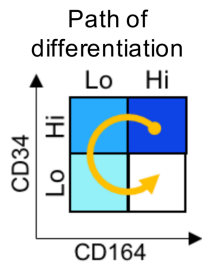

a

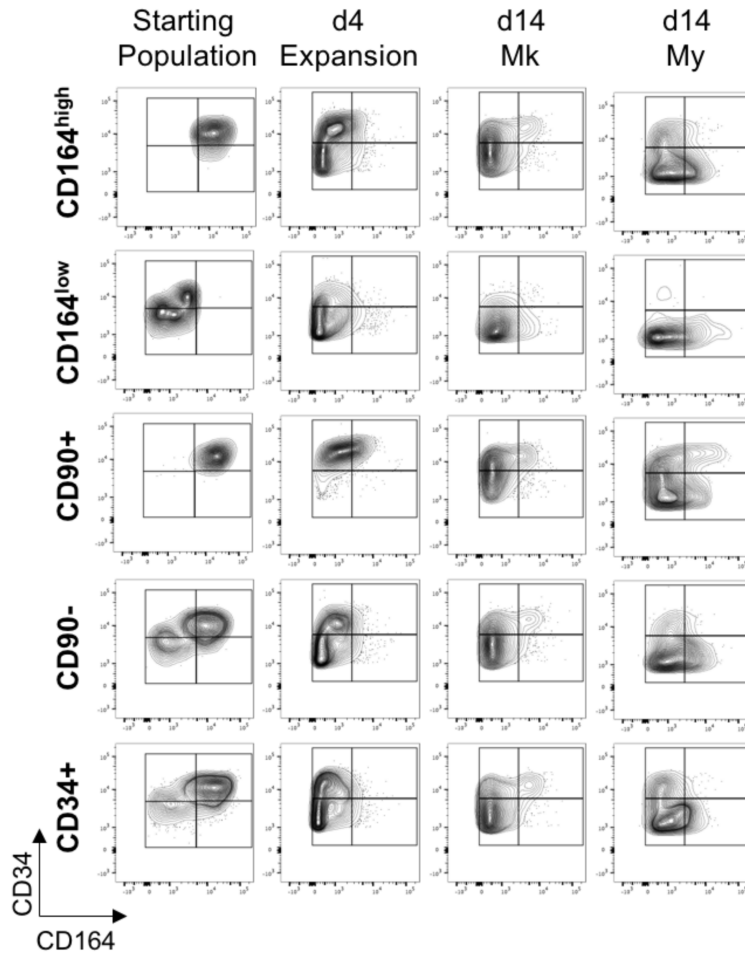

b

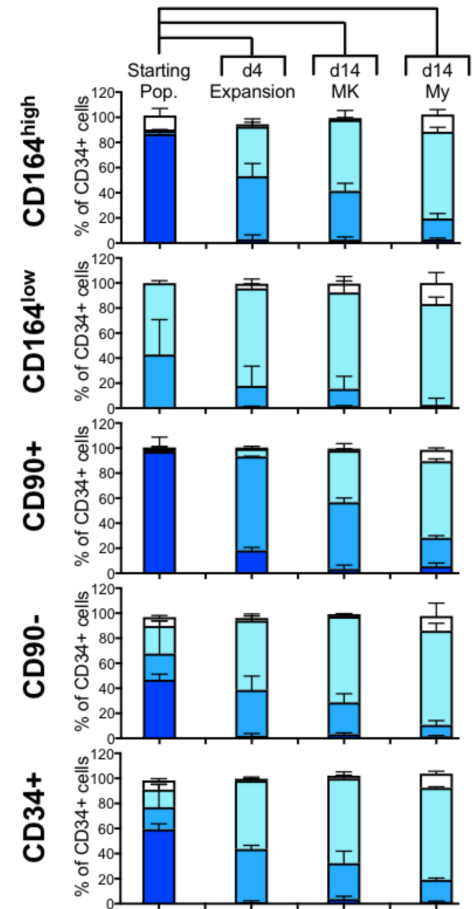

**Supplementary Figure 21 | Path of differentiation of the sorted subsets through the analysis of CD164 and CD34 expression. a)** FACS plots showing the cell phenotype at day 0 (Starting population) and in differentiation states at day 4 in Expansion culture, or at day 14 in Mk and My culture conditions. Top left, scheme representing the path of differentiation from the most primitive fraction of CD34<sup>high</sup>CD164<sup>high</sup> cells. **b)** Bar graphs summarizing the cytometric analysis described in a). The colour code used is the same of the scheme in a). Shown are Median  $\pm$  Error from 3 independent BM.

**a**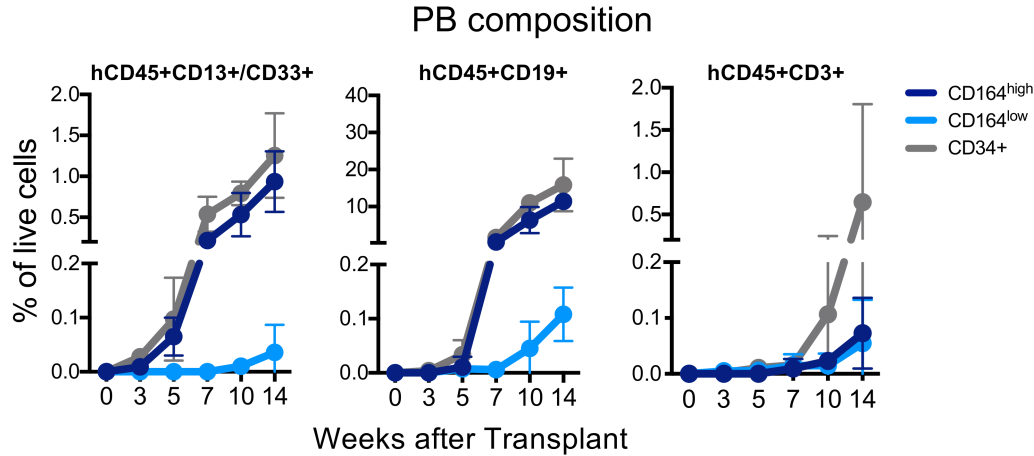**b**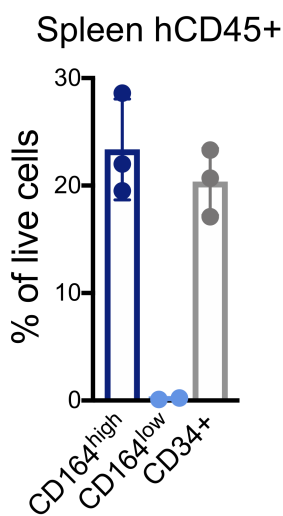**c**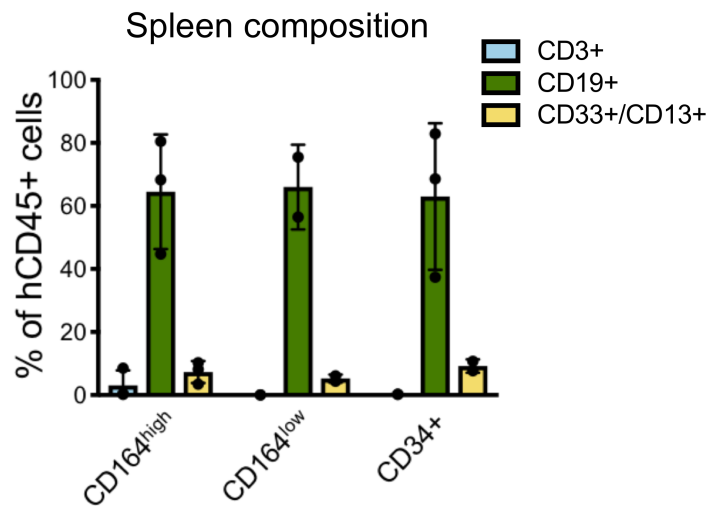

**Supplementary Figure 22 | Human engraftment in PB and spleen of transplanted NBSGW mice.** **a)** Composition of human CD45+ cells in murine PB at the indicated number of weeks post-transplant. Myeloid and lymphoid reconstitution were analysed within the human CD45+ population. **b)** Human CD45+ cell engraftment in murine spleen at 16 weeks post-transplant. Color legend as in a). **c)** Composition of human CD45+ cells showed in b). N= 3-4 mice per group.

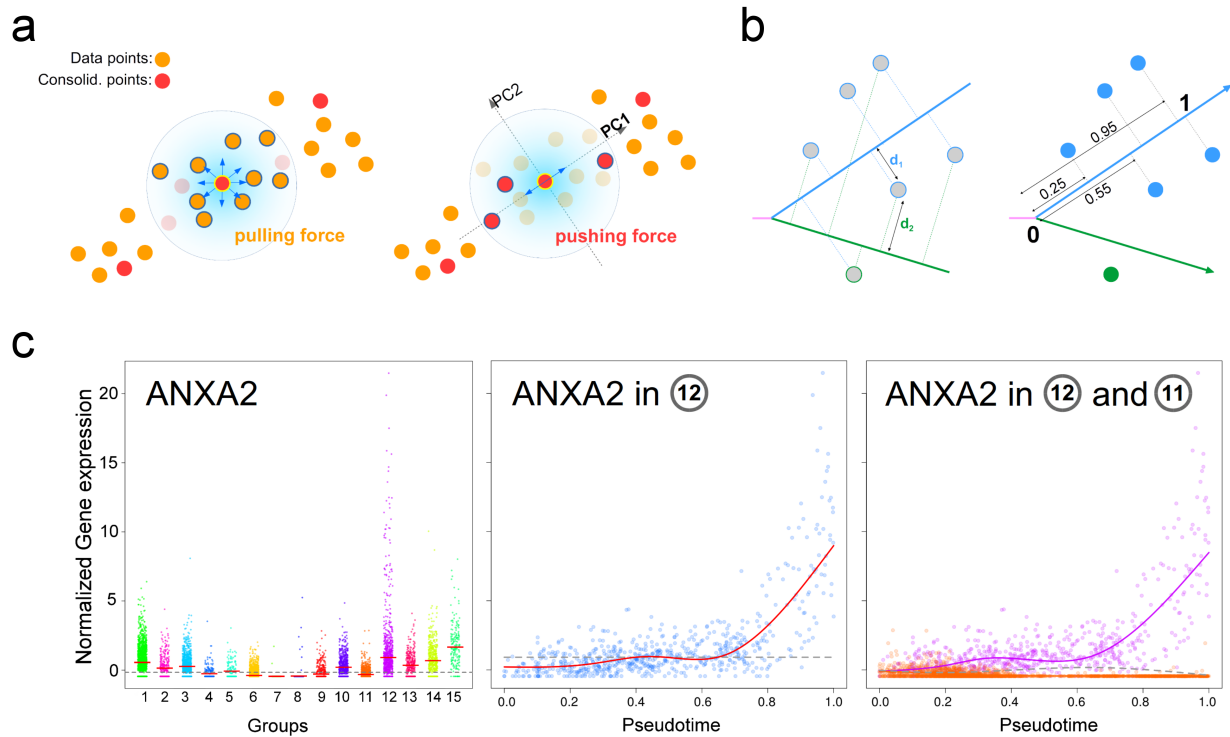

**Supplementary Figure 23 | Explanatory figures for structure-aware filtering algorithm and gene expression analyses.** **a)** Structure-aware filtering<sup>5</sup> is based on the iterative update of consolidation points positions according to a velocity field with two components. The pulling force (left) make consolidation points to move towards regions enriched for data points. The repulsion term (right) is the sum of all the pushing forces exerted by neighbour consolidation points and can only move points on a specific, locally optimal, line of action (first principal component). **b)** Each cell is associated to the closest branch by comparing cell-trajectories orthogonal distances (left). Cell pseudotime value, measuring the progression status along the differentiation process, is given by the rescaled distance between cell orthogonal projection onto the associated trajectory and branch stem point (right). **c)** Examples for gene expression analyses performed. Left, ANXA2 group-wise gene expression (adjusted p-value:  $9.31E-159$ ). Red lines correspond to groups averages ( $M_1$ ) and the dashed grey line corresponds to the overall mean ( $M_0$ ). Centre, ANXA2 association with progression (pseudotime) along branch 12 (Monocytes) in Lin-CD34/CD164 transcriptome map (adjusted p-value:  $1.0821E-126$ ). Red line is the spline based regression curve ( $M_1$ ), whereas dashed grey line represents the restricted model  $M_0$ . Right, ANXA2 expression comparison among groups 11 (Neutrophils) and 12 (Monocytes). Group specific regression curves with common intercept ( $M_1$ ) are shown with solid coloured lines. The dashed grey line corresponds to the nonlinear model fitted without considering group labels (adjusted p-value:  $1.3409E-260$ ).

## Supplementary Tables

Ref to Figure 1

| Population     | Sorted events | Estimated barcoded cells | Post-filtering barcoded cells | Gate on CD34+ cells                  |
|----------------|---------------|--------------------------|-------------------------------|--------------------------------------|
| <b>HSC</b>     | 25237         | 4000                     | 1282                          | Lin-CD34+CD38-CD90+CD45RA-           |
| <b>MPP</b>     | 4133          | 1000                     | 215                           | Lin-CD34+CD38-CD90-CD45RA-           |
| <b>MLP</b>     | 2186          | N.A*                     | 123                           | Lin-CD34+CD38-CD90-CD45RA+           |
| <b>PREB/NK</b> | 2541          | N.A*                     | 592                           | Lin-CD34+CD38+CD7-CD10+              |
| <b>MEP</b>     | 21964         | 4000                     | 1211                          | Lin-CD34+CD38+CD7-CD10-CD135-CD45RA- |
| <b>CMP</b>     | 31832         | 4000                     | 1576                          | Lin-CD34+CD38+CD7-CD10-CD135+CD45RA- |
| <b>GMP</b>     | 16065         | 2000                     | 1012                          | Lin-CD34+CD38+CD7-CD10-CD135+CD45RA+ |

Ref to Figure 2

| Population                  | Sorted events | Estimated barcoded cells | Post-filtering barcoded cells | Gate on MNC          |
|-----------------------------|---------------|--------------------------|-------------------------------|----------------------|
| <b>Lin-CD34+CD164+</b>      | 426759        | 5300                     | 6343                          | Lin-CD34+CD164+      |
| <b>Lin-CD34lowCD164high</b> | 252909        | 5000                     | 4266                          | Lin-CD34lowCD164high |
| <b>Lin-CD34-CD164high</b>   | 663506        | 5000                     | 4434                          | Lin-CD34-CD164high   |
| <b>Lin-CD34-CD164low</b>    | 71220         | 300                      | 358                           | Lin-CD34-CD164low    |

**Supplementary Table 1 | Sorted events and estimated/ post-filtering barcoded cells in each population analysed.** The information of numbers of sorted events and estimated/post-filtering barcoded cells from each population analysed are provided in this table, together with the surface marker profile of each population.



| <b>Population</b> | <b>Post-filtering<br/>barcoded cells</b> | <b>FACS gating<br/>proportion</b> | <b>Individual<br/>barcode weight</b> |
|-------------------|------------------------------------------|-----------------------------------|--------------------------------------|
| HSC               | 1282                                     | 0.132                             | 1.03E-04                             |
| MPP               | 215                                      | 0.280                             | 1.30E-03                             |
| MLP               | 123                                      | 0.044                             | 3.55E-04                             |
| PreB/NK           | 592                                      | 0.019                             | 3.26E-05                             |
| MEP               | 1211                                     | 0.006                             | 4.96E-06                             |
| CMP               | 1576                                     | 0.325                             | 2.07E-04                             |
| GMP               | 1012                                     | 0.193                             | 1.91E-04                             |

| <b>Population</b>                             | <b>Post-filtering<br/>barcoded cells</b> | <b>FACS gating<br/>proportion</b> | <b>Individual<br/>barcode weight</b> |
|-----------------------------------------------|------------------------------------------|-----------------------------------|--------------------------------------|
| Lin-CD34+CD164+                               | 6343                                     | 0.074                             | 1.30E-05                             |
| Lin-CD34 <sup>low</sup> CD164 <sup>high</sup> | 4266                                     | 0.073                             | 1.78E-05                             |
| Lin-CD34-CD164 <sup>high</sup>                | 4434                                     | 0.728                             | 1.78E-04                             |
| Lin-CD34-CD164 <sup>low</sup>                 | 358                                      | 0.048                             | 1.45E-04                             |

**Supplementary Table 2 | Details for the generation of the observed and predicted cell density estimations shown in Supplementary Figure 1.**

| Subpopulation | Parameter [P(Subpop)] | CD135-               |                           | CD135+               |                           | T-test P-value  | CD135- | CD135+ |
|---------------|-----------------------|----------------------|---------------------------|----------------------|---------------------------|-----------------|--------|--------|
|               |                       | Parameter Est. [MoM] | Parameter Est. S.E. [MoM] | Parameter Est. [MoM] | Parameter Est. S.E. [MoM] |                 |        |        |
| HSC           | pi:HSC                | 2.420E-02            | 2.171E-02                 | 3.077E-02            | 1.942E-02                 | 7.16E-01        | -      | -      |
| MPP           | pi:MPP                | 5.827E-02            | 6.947E-02                 | 3.728E-02            | 3.861E-02                 | 6.77E-01        | -      | -      |
| MLP           | pi:MLP                | 1.091E-02            | 7.681E-03                 | 9.381E-03            | 3.809E-03                 | 7.78E-01        | -      | -      |
| ETP           | pi:ETP                | 3.408E-02            | 2.237E-03                 | 2.629E-02            | 1.481E-02                 | 4.59E-01        | -      | -      |
| PREB/NK       | pi:PREB/NK            | 3.289E-01            | 1.700E-01                 | 4.136E-02            | 1.742E-02                 | 9.80E-02        | -      | -      |
| MEP           | pi:MEP                | 4.480E-01            | 1.103E-01                 | NA                   | NA                        | NA              | ▲      | ▼      |
| CD10-CD45+    | pi:CD10-CD45+         | 7.306E-02            | 3.282E-02                 | NA                   | NA                        | NA              | ▲      | ▼      |
| CMP           | pi:CMP                | 1.989E-02            | 8.857E-03                 | 4.570E-01            | 3.234E-02                 | <b>9.49E-04</b> | ▼      | ▲      |
| GMP           | pi:GMP                | 2.694E-03            | 2.332E-03                 | 3.979E-01            | 6.380E-02                 | <b>8.51E-03</b> | ▼      | ▲      |

**Supplementary Table 3 | Statistical analysis on the HSPC bar graph of Figure 3d.** The method of moment estimation of each HSPC subpopulation proportion with related standard deviation are provided in these tables. The comparison of proportion estimates in the CD135- and CD135+ fractions have been calculated by means of the Student's t-test, under different variances hypothesis (BM #10,11,12).

Figure 5d  
BM #1,2,3,4,5,6,7,8,9

| Subpopulation | Parameter [P(Subpop)] | CD164 <sup>high</sup> |                           | CD164 <sup>low</sup> |                           | T-test P-value  | CD164 <sup>high</sup> | CD164 <sup>low</sup> |
|---------------|-----------------------|-----------------------|---------------------------|----------------------|---------------------------|-----------------|-----------------------|----------------------|
|               |                       | Parameter Est. [MoM]  | Parameter Est. S.E. [MoM] | Parameter Est. [MoM] | Parameter Est. S.E. [MoM] |                 |                       |                      |
| HSC           | pi:HSC                | 3.420E-02             | 2.270E-02                 | 7.590E-04            | 1.283E-03                 | <b>2.21E-03</b> | ▲                     | ▼                    |
| MPP           | pi:MPP                | 5.441E-02             | 4.562E-02                 | 6.130E-03            | 7.878E-03                 | <b>1.31E-02</b> | ▲                     | ▼                    |
| MLP           | pi:MLP                | 8.778E-03             | 4.213E-03                 | 5.018E-03            | 5.737E-03                 | 1.34E-01        | -                     | -                    |
| ETP           | pi:ETP                | 1.935E-02             | 7.883E-03                 | 2.042E-02            | 7.231E-03                 | 7.67E-01        | -                     | -                    |
| PREB/NK       | pi:PREB               | 1.999E-02             | 6.904E-03                 | 1.094E-01            | 4.410E-02                 | <b>2.65E-04</b> | ▼                     | ▲                    |
| CMP/MEP       | pi:CMP/MEP            | 4.849E-01             | 4.284E-02                 | 1.081E-01            | 7.906E-02                 | <b>2.16E-08</b> | ▲                     | ▼                    |
| GMP           | pi:GMP                | 2.969E-01             | 5.665E-02                 | 3.205E-01            | 4.973E-02                 | 3.63E-01        | -                     | -                    |
| LINp          | pi:LINp               | 8.148E-02             | 3.837E-02                 | 4.297E-01            | 1.263E-01                 | <b>1.79E-05</b> | ▼                     | ▲                    |

| Subpopulation | Parameter [P(Subpop)] | CD164 <sup>high</sup> |                           | CD34+                |                           | T-test P-value  | CD164 <sup>high</sup> | CD34 |
|---------------|-----------------------|-----------------------|---------------------------|----------------------|---------------------------|-----------------|-----------------------|------|
|               |                       | Parameter Est. [MoM]  | Parameter Est. S.E. [MoM] | Parameter Est. [MoM] | Parameter Est. S.E. [MoM] |                 |                       |      |
| HSC           | pi:HSC                | 3.420E-02             | 2.270E-02                 | 2.510E-02            | 1.906E-02                 | 3.71E-01        | -                     | -    |
| MPP           | pi:MPP                | 5.441E-02             | 4.562E-02                 | 3.750E-02            | 2.945E-02                 | 3.66E-01        | -                     | -    |
| MLP           | pi:MLP                | 8.778E-03             | 4.213E-03                 | 8.361E-03            | 4.455E-03                 | 8.41E-01        | -                     | -    |
| ETP           | pi:ETP                | 1.935E-02             | 7.883E-03                 | 1.975E-02            | 7.595E-03                 | 9.14E-01        | -                     | -    |
| PREB/NK       | pi:PREB               | 1.999E-02             | 6.904E-03                 | 4.238E-02            | 1.808E-02                 | <b>5.79E-03</b> | ▼                     | ▲    |
| CMP/MEP       | pi:CMP/MEP            | 4.849E-01             | 4.284E-02                 | 3.818E-01            | 4.371E-02                 | <b>1.18E-04</b> | ▲                     | ▼    |
| GMP           | pi:GMP                | 2.969E-01             | 5.665E-02                 | 3.086E-01            | 3.643E-02                 | 6.12E-01        | -                     | -    |
| LINp          | pi:LINp               | 8.148E-02             | 3.837E-02                 | 1.765E-01            | 3.925E-02                 | <b>8.87E-05</b> | ▼                     | ▲    |

| Subpopulation | Parameter [P(Subpop)] | CD164 <sup>low</sup> |                           | CD34+                |                           | T-test P-value  | CD164 <sup>low</sup> | CD34 |
|---------------|-----------------------|----------------------|---------------------------|----------------------|---------------------------|-----------------|----------------------|------|
|               |                       | Parameter Est. [MoM] | Parameter Est. S.E. [MoM] | Parameter Est. [MoM] | Parameter Est. S.E. [MoM] |                 |                      |      |
| HSC           | pi:HSC                | 7.590E-04            | 1.283E-03                 | 2.510E-02            | 1.906E-02                 | <b>4.98E-03</b> | ▼                    | ▲    |
| MPP           | pi:MPP                | 6.130E-03            | 7.878E-03                 | 3.750E-02            | 2.945E-02                 | <b>1.28E-02</b> | ▼                    | ▲    |
| MLP           | pi:MLP                | 5.018E-03            | 5.737E-03                 | 8.361E-03            | 4.455E-03                 | 1.88E-01        | -                    | -    |
| ETP           | pi:ETP                | 2.042E-02            | 7.231E-03                 | 1.975E-02            | 7.595E-03                 | 8.50E-01        | -                    | -    |
| PREB/NK       | pi:PREB               | 1.094E-01            | 4.410E-02                 | 4.238E-02            | 1.808E-02                 | <b>1.56E-03</b> | ▲                    | ▼    |
| CMP/MEP       | pi:CMP/MEP            | 1.081E-01            | 7.906E-02                 | 3.818E-01            | 4.371E-02                 | <b>7.42E-07</b> | ▼                    | ▲    |
| GMP           | pi:GMP                | 3.205E-01            | 4.973E-02                 | 3.086E-01            | 3.643E-02                 | 5.71E-01        | -                    | -    |
| LINp          | pi:LINp               | 4.297E-01            | 1.263E-01                 | 1.765E-01            | 3.925E-02                 | <b>2.24E-04</b> | ▲                    | ▼    |

Supplementary Figure 13c

MPB #1,2,3,4

| Subpopulation | Parameter [P(Subpop)] | CD164 <sup>high</sup> |                           | CD164 <sup>low</sup> |                           | T-test P-value  | CD164 <sup>high</sup> | CD164 <sup>low</sup> |
|---------------|-----------------------|-----------------------|---------------------------|----------------------|---------------------------|-----------------|-----------------------|----------------------|
|               |                       | Parameter Est. [MoM]  | Parameter Est. S.E. [MoM] | Parameter Est. [MoM] | Parameter Est. S.E. [MoM] |                 |                       |                      |
| HSC           | pi:HSC                | 5.166E-02             | 2.289E-02                 | 1.233E-02            | 2.596E-03                 | 9.50E-02        | -                     | -                    |
| MPP           | pi:MPP                | 9.830E-02             | 2.687E-02                 | 2.739E-02            | 8.725E-03                 | <b>3.45E-02</b> | ▲                     | ▼                    |
| MLP           | pi:MLP                | 2.815E-02             | 2.133E-02                 | 1.324E-02            | 7.789E-03                 | 3.52E-01        | -                     | -                    |
| ETP           | pi:ETP                | 6.949E-03             | 9.757E-03                 | 1.073E-02            | 8.859E-03                 | 6.46E-01        | -                     | -                    |
| PREB/NK       | pi:PREB               | 1.400E-02             | 1.266E-02                 | 2.975E-02            | 1.803E-02                 | 2.91E-01        | -                     | -                    |
| CMP/MEP       | pi:CMP/MEP            | 7.487E-02             | 5.858E-02                 | 1.235E-01            | 7.267E-02                 | 4.20E-01        | -                     | -                    |
| GMP           | pi:GMP                | 7.209E-01             | 5.484E-02                 | 7.759E-01            | 8.693E-02                 | 4.15E-01        | -                     | -                    |
| LINp          | pi:LINp               | 5.199E-03             | 3.574E-03                 | 7.126E-03            | 5.662E-03                 | 6.49E-01        | -                     | -                    |

| Subpopulation | Parameter<br>[P(Subpop)] | CD164 <sup>high</sup>   |                                 | CD34 <sup>+</sup>       |                                 | T-test P-<br>value | CD164 <sup>high</sup> | CD34 |
|---------------|--------------------------|-------------------------|---------------------------------|-------------------------|---------------------------------|--------------------|-----------------------|------|
|               |                          | Parameter<br>Est. [MoM] | Parameter<br>Est. S.E.<br>[MoM] | Parameter<br>Est. [MoM] | Parameter<br>Est. S.E.<br>[MoM] |                    |                       |      |
| HSC           | pi:HSC                   | 5.166E-02               | 2.289E-02                       | 3.219E-02               | 1.480E-02                       | 2.94E-01           | -                     | -    |
| MPP           | pi:MPP                   | 9.830E-02               | 2.687E-02                       | 6.261E-02               | 1.798E-02                       | 1.39E-01           | -                     | -    |
| MLP           | pi:MLP                   | 2.815E-02               | 2.133E-02                       | 1.897E-02               | 1.081E-02                       | 5.54E-01           | -                     | -    |
| ETP           | pi:ETP                   | 6.949E-03               | 9.757E-03                       | 7.226E-03               | 9.422E-03                       | 9.73E-01           | -                     | -    |
| PREB/NK       | pi:PREB                  | 1.400E-02               | 1.266E-02                       | 1.961E-02               | 1.139E-02                       | 5.99E-01           | -                     | -    |
| CMP/MEP       | pi:CMP/MEP               | 7.487E-02               | 5.858E-02                       | 1.039E-01               | 7.494E-02                       | 6.27E-01           | -                     | -    |
| GMP           | pi:GMP                   | 7.209E-01               | 5.484E-02                       | 7.495E-01               | 6.642E-02                       | 5.97E-01           | -                     | -    |
| LINp          | pi:LINp                  | 5.199E-03               | 3.574E-03                       | 5.999E-03               | 3.254E-03                       | 7.89E-01           | -                     | -    |

| Subpopulation | Parameter<br>[P(Subpop)] | CD164 <sup>low</sup>    |                                 | CD34 <sup>+</sup>       |                                 | T-test P-<br>value | CD164 <sup>low</sup> | CD34 |
|---------------|--------------------------|-------------------------|---------------------------------|-------------------------|---------------------------------|--------------------|----------------------|------|
|               |                          | Parameter<br>Est. [MoM] | Parameter<br>Est. S.E.<br>[MoM] | Parameter<br>Est. [MoM] | Parameter<br>Est. S.E.<br>[MoM] |                    |                      |      |
| HSC           | pi:HSC                   | 1.233E-02               | 2.596E-03                       | 3.219E-02               | 1.480E-02                       | 1.42E-01           | -                    | -    |
| MPP           | pi:MPP                   | 2.739E-02               | 8.725E-03                       | 6.261E-02               | 1.798E-02                       | 5.80E-02           | -                    | -    |
| MLP           | pi:MLP                   | 1.324E-02               | 7.789E-03                       | 1.897E-02               | 1.081E-02                       | 5.01E-01           | -                    | -    |
| ETP           | pi:ETP                   | 1.073E-02               | 8.859E-03                       | 7.226E-03               | 9.422E-03                       | 6.64E-01           | -                    | -    |
| PREB/NK       | pi:PREB                  | 2.975E-02               | 1.803E-02                       | 1.961E-02               | 1.139E-02                       | 4.65E-01           | -                    | -    |
| CMP/MEP       | pi:CMP/MEP               | 1.235E-01               | 7.267E-02                       | 1.039E-01               | 7.494E-02                       | 7.61E-01           | -                    | -    |
| GMP           | pi:GMP                   | 7.759E-01               | 8.693E-02                       | 7.495E-01               | 6.642E-02                       | 6.99E-01           | -                    | -    |
| LINp          | pi:LINp                  | 7.126E-03               | 5.662E-03                       | 5.999E-03               | 3.254E-03                       | 7.83E-01           | -                    | -    |

**Supplementary Table 4 | Statistical analysis on the HSPC bar graphs of Figure 5d and Supplementary Figure 13c.** The method of moment estimation of each HSPC subpopulation proportion with related standard deviation are provided in these tables. The comparison of proportion estimates in the CD164<sup>high</sup> and CD164<sup>low</sup> fractions, and CD34<sup>+</sup> cells have been calculated by means of the Student's t-test, under different variance hypothesis.

## Supplementary References

1. Haghverdi, L., Buettner, F. & Theis, F. J. Diffusion maps for high-dimensional single-cell analysis of differentiation data. *Bioinformatics* **31**, 2989–2998 (2015).
2. Uhlen, Mathias, et al. The human protein atlas. *Retrived from: [http://www. proteinatlas. Org](http://www.proteinatlas.org)* (2015).
3. Forbes, Simon A., et al. COSMIC: somatic cancer genetics at high-resolution. *Nucleic acids research* 45.D1 (2016): D777-D783.
4. Croft, David, et al. The Reactome pathway knowledgebase. *Nucleic acids research* 42.D1 (2013): D472-D477.
5. Wu, Shihao, et al. Structure-aware Data Consolidation. *IEEE transactions on pattern analysis and machine intelligence* (2017).
